# Supplementary material for: Comprehensive analysis of ZFPM2-AS1 prognostic value, immune microenvironment, drug sensitivity, and co-expression network: from gastric adenocarcinoma to pan-cancers
Source: Springer Nature journal article supplement (doi:10.1007/s12672-022-00487-0), 2022-04-13

# **Comprehensive Analysis of ZFPM2-AS1 Prognostic Value, Immune Microenvironment, Drug Sensitivity, and Co-expression Network: From Gastric Adenocarcinoma to Pan-cancers**

## **Discover Oncology**

Di Chen<sup>1</sup>, Mengmeng Wang<sup>1</sup>, Xin Jiang<sup>1</sup>, Zhifan Xiong<sup>1</sup>

<sup>1</sup> Department of Gastroenterology, Liyuan Hospital, Tongji Medical College, Huazhong University of Science and Technology, Wuhan, China.

Corresponding author: Zhifan Xiong

Department of Gastroenterology, Liyuan Hospital, Tongji Medical College, Huazhong University of Science and Technology, Wuhan, 430061, China.

Email: [xiongzhiban@126.com](mailto:xiongzhiban@126.com)

**Fig. S1** Weighted Gene Co-Expression Network Analysis of GAC. (a) Analysis for various soft-thresholding powers. (b) Cluster diagram of gene cluster of GAC. (c) Heatmap of the correlation between the clinical traits and modules.

**Fig. S2** The survival curve of differentially expressed immune-related lncRNAs for OS in GAC.

**Fig. S3** The relationship between ZFPM2-AS1 expression and infiltrating immune cells in the microenvironment of pan-cancers.

**Fig. S4** Gene set enrichment analysis of ZFPM2-AS1 in pan-cancers.

**Fig. S5** Differential expression of target mRNAs in paired GAC samples and normal samples from TCGA.

**Fig. S6** The survival curve of target mRNAs for OS in GAC.

# Supplementary Figure 1

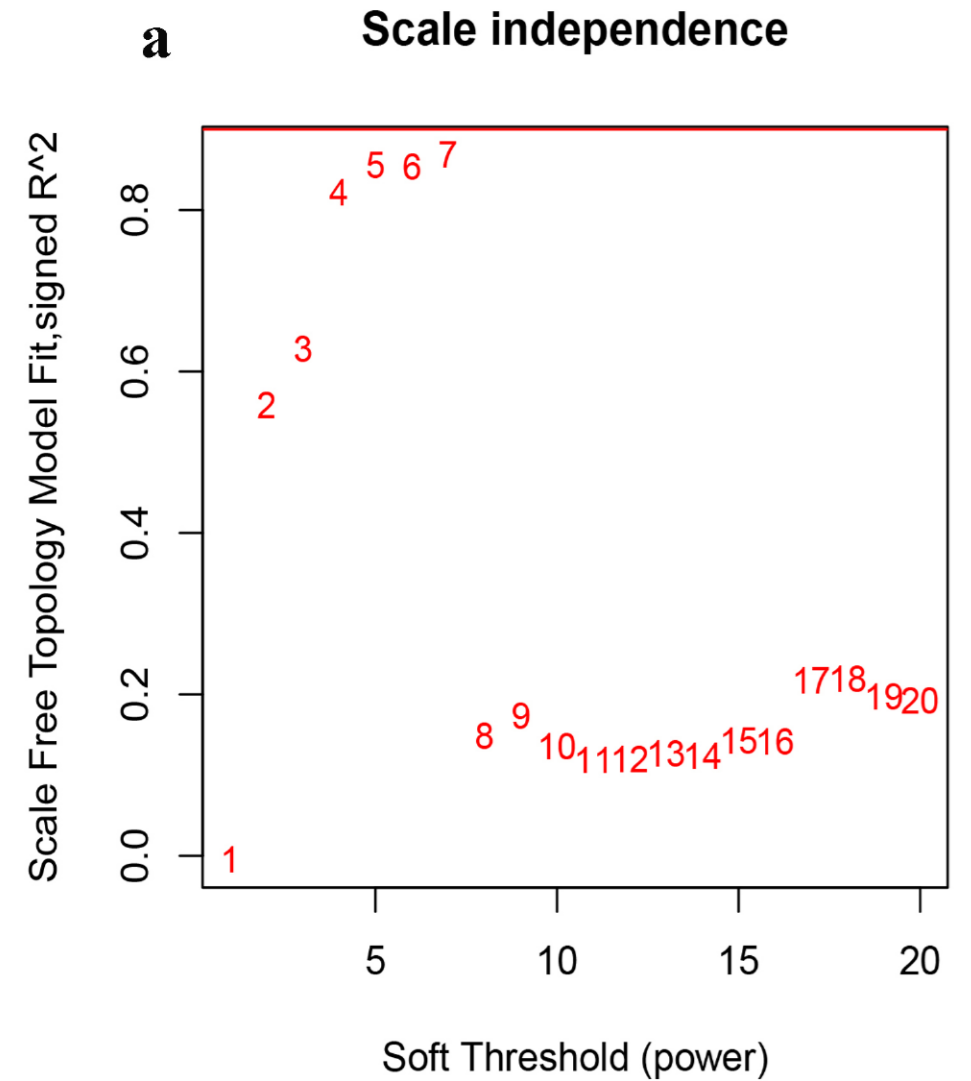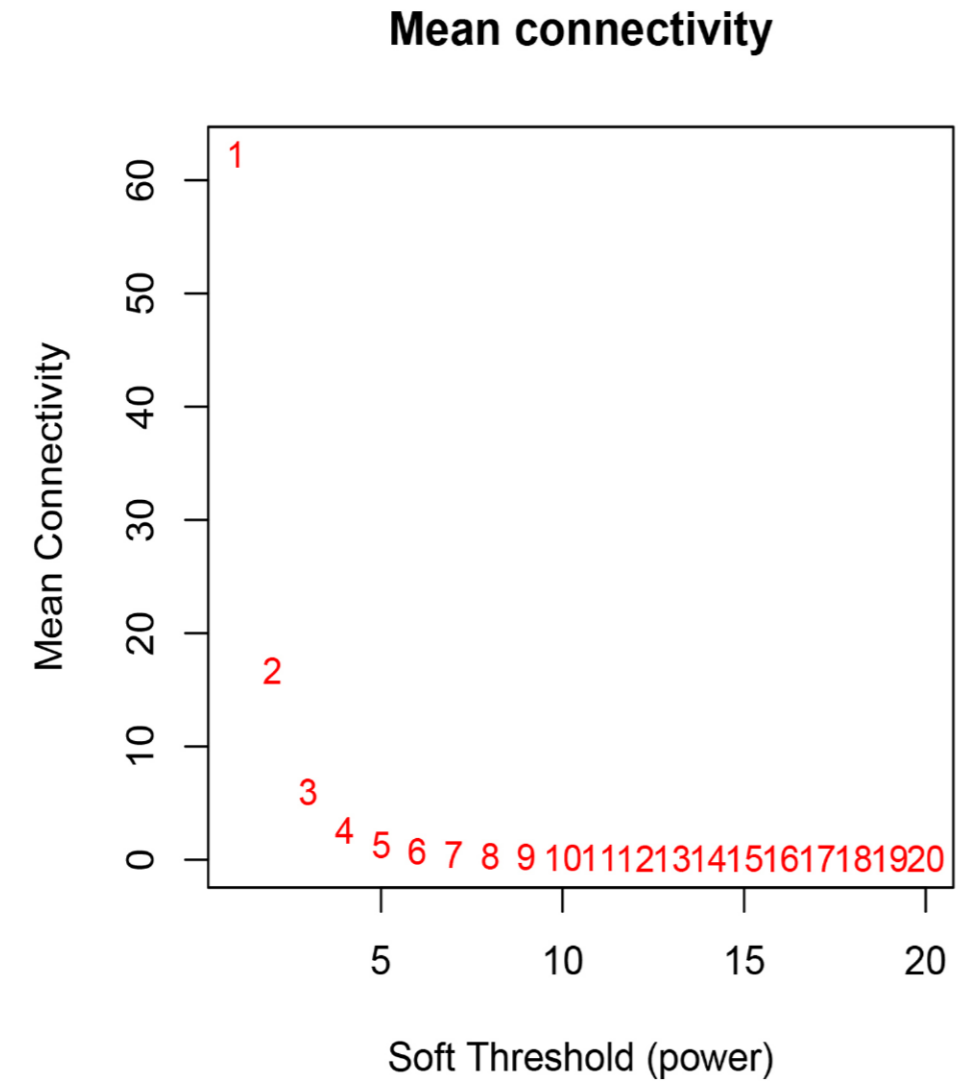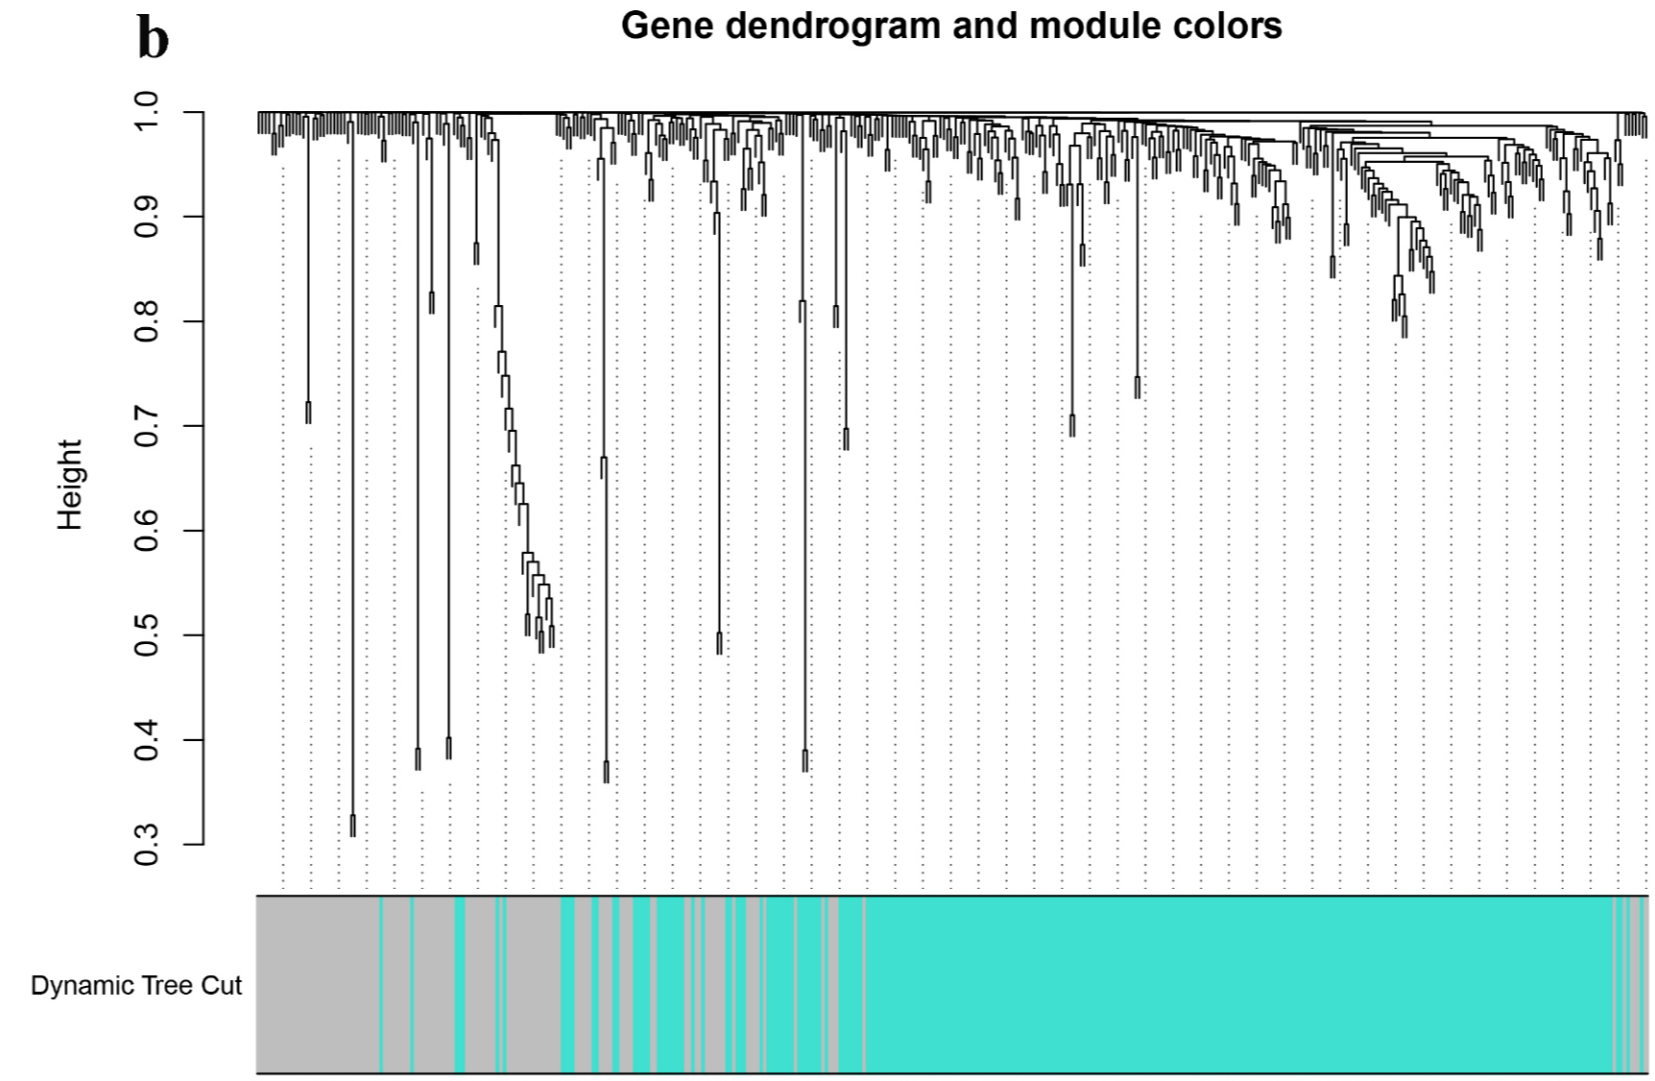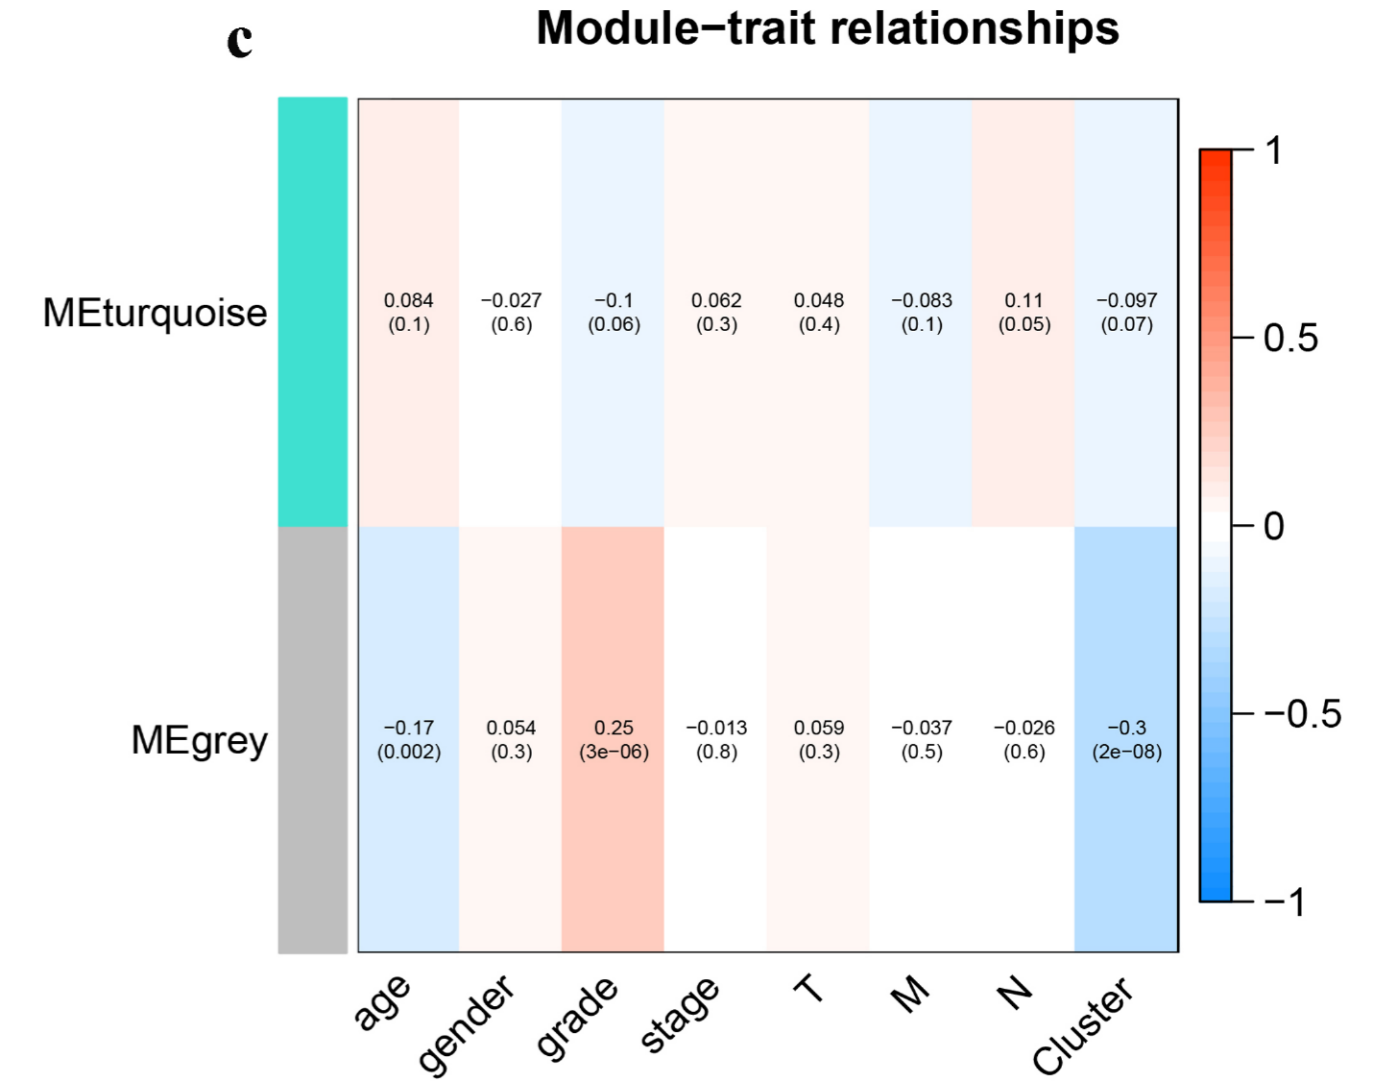



Supplementary Figure 3

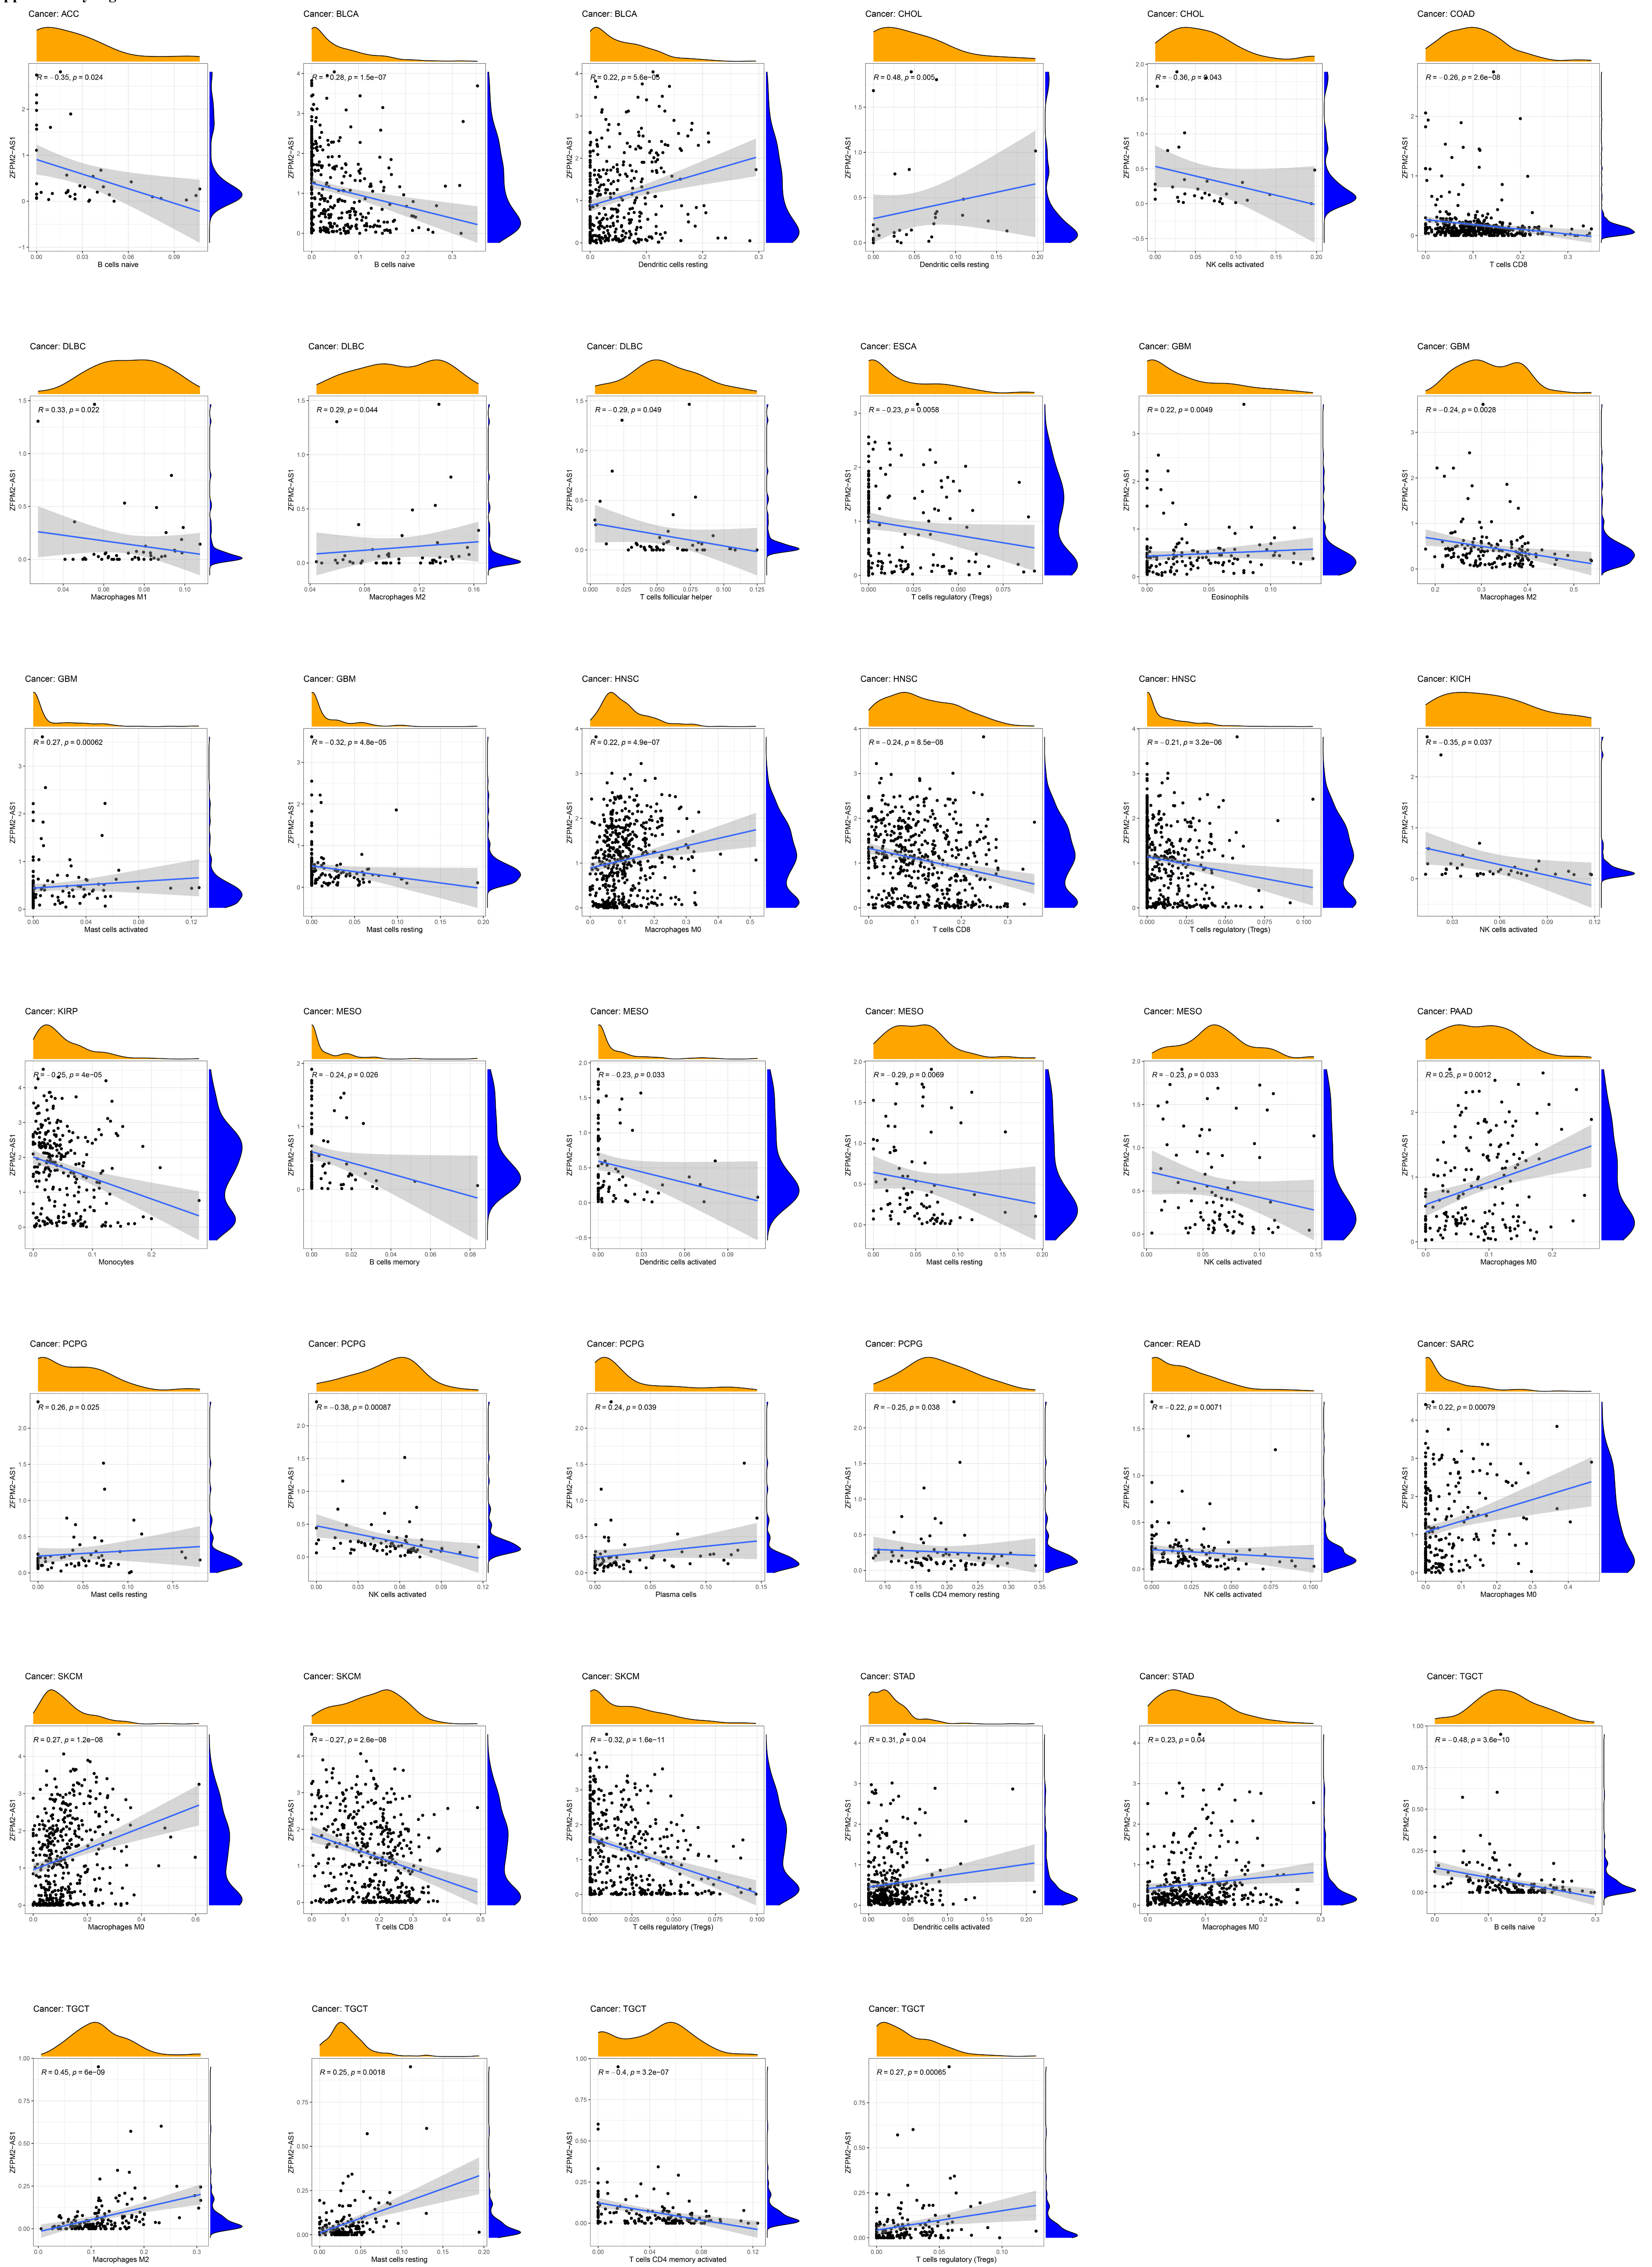

Supplementary Figure 4

### ACC

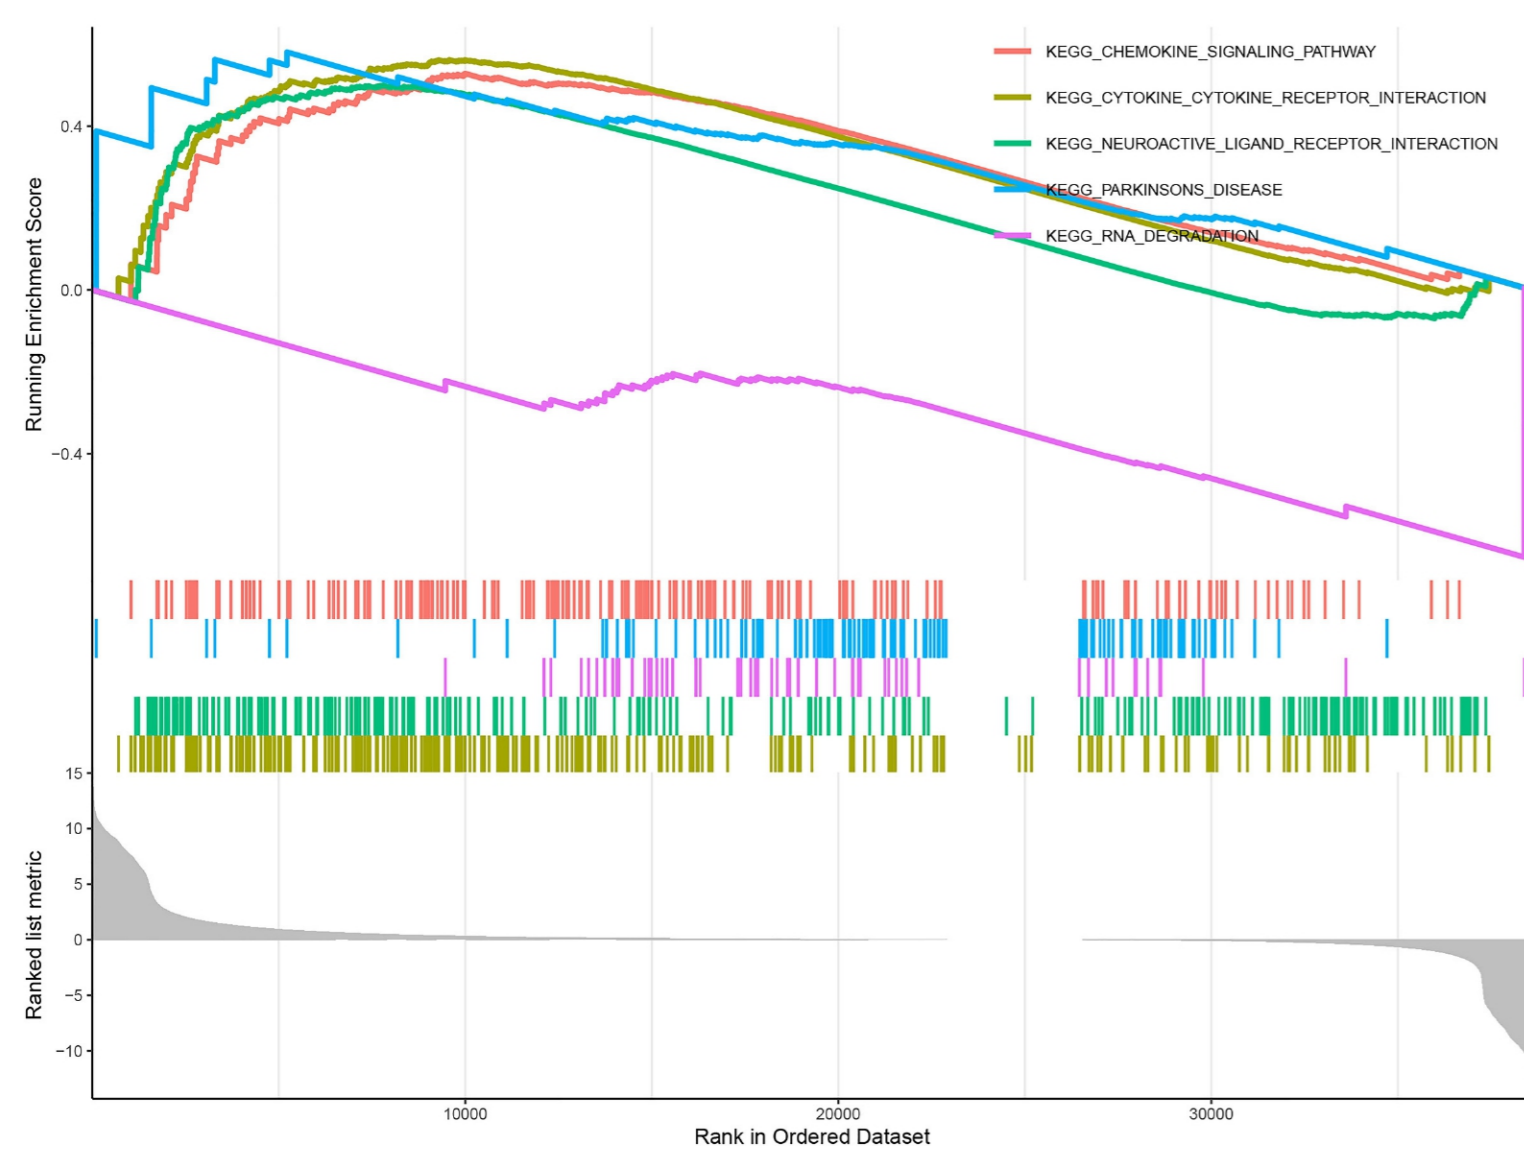

### BLCA

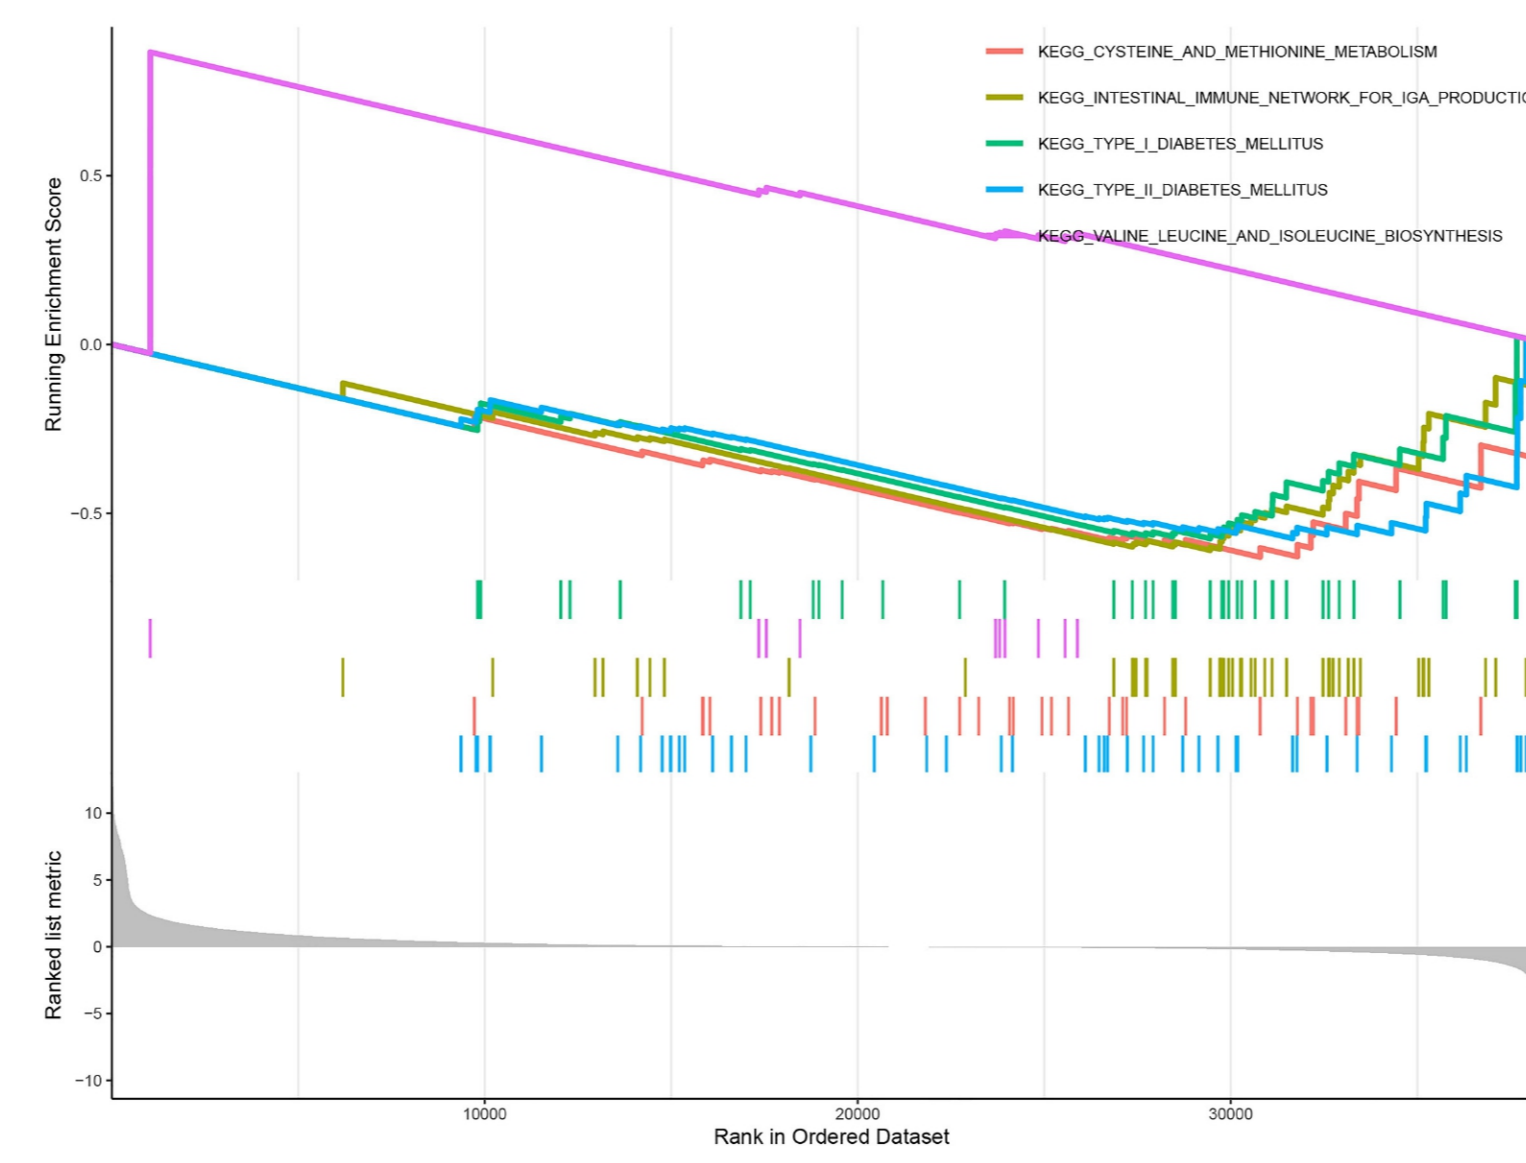

### CHOL

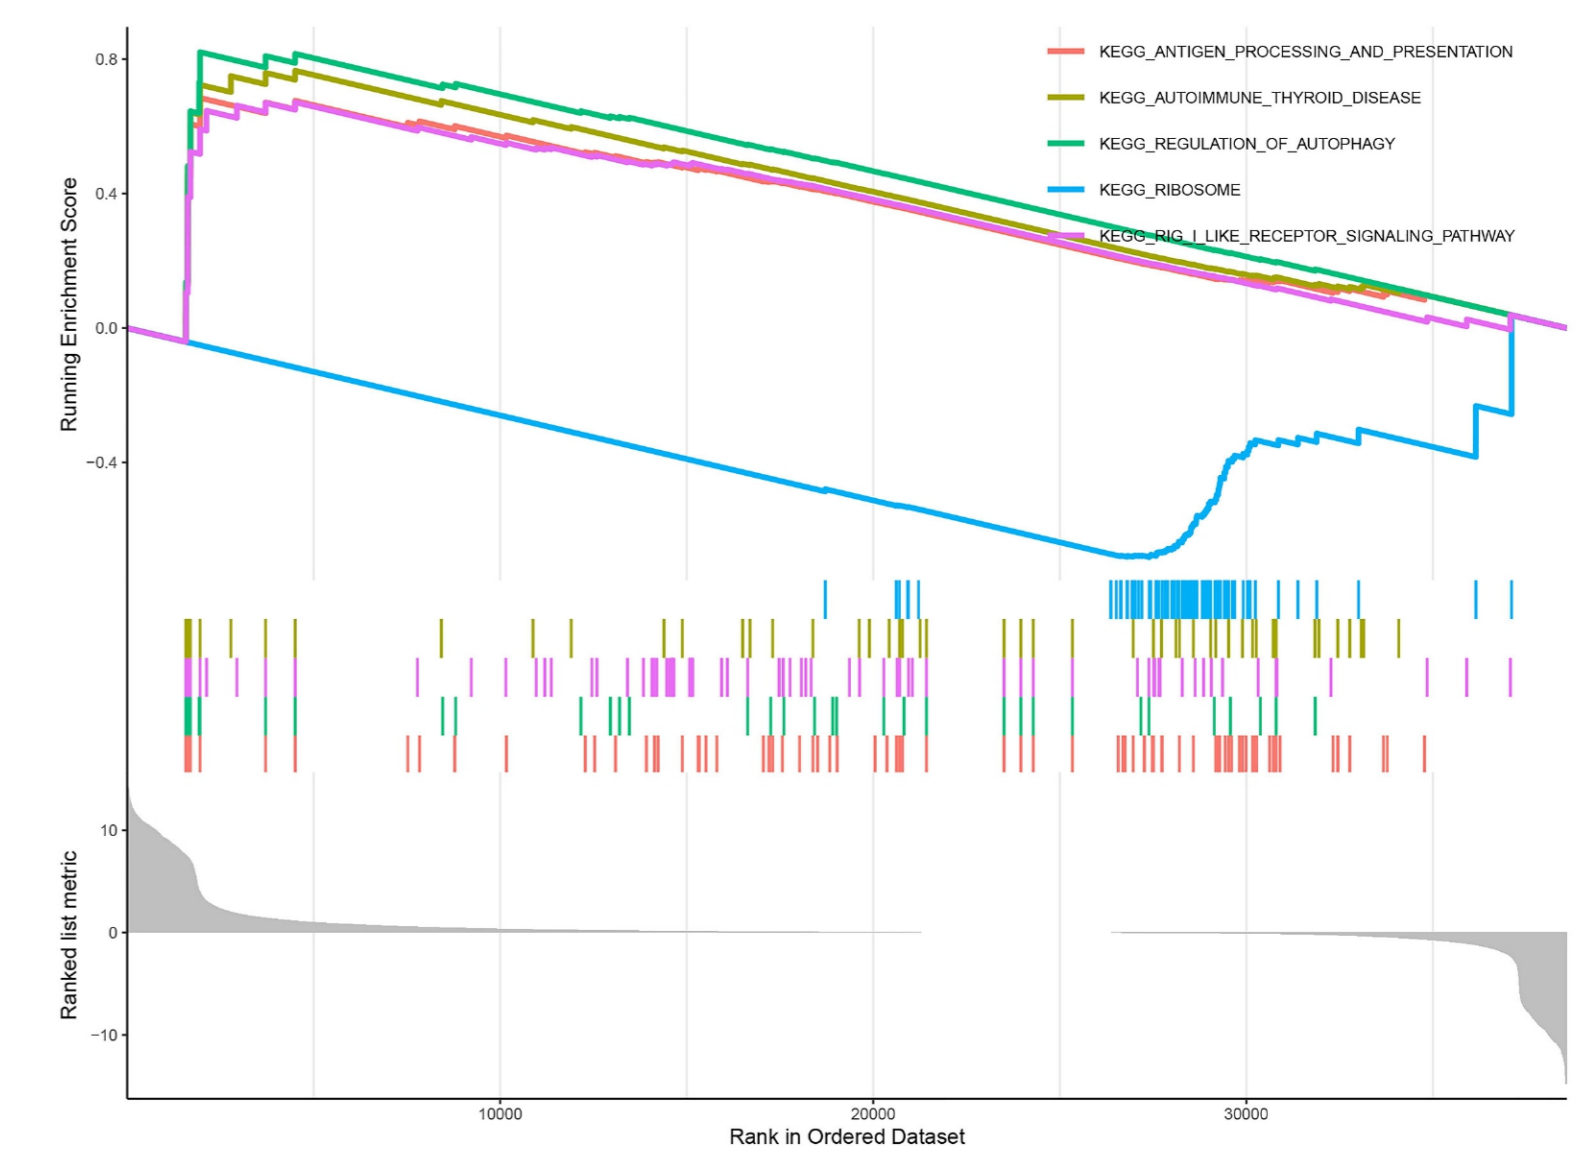

### KIRC

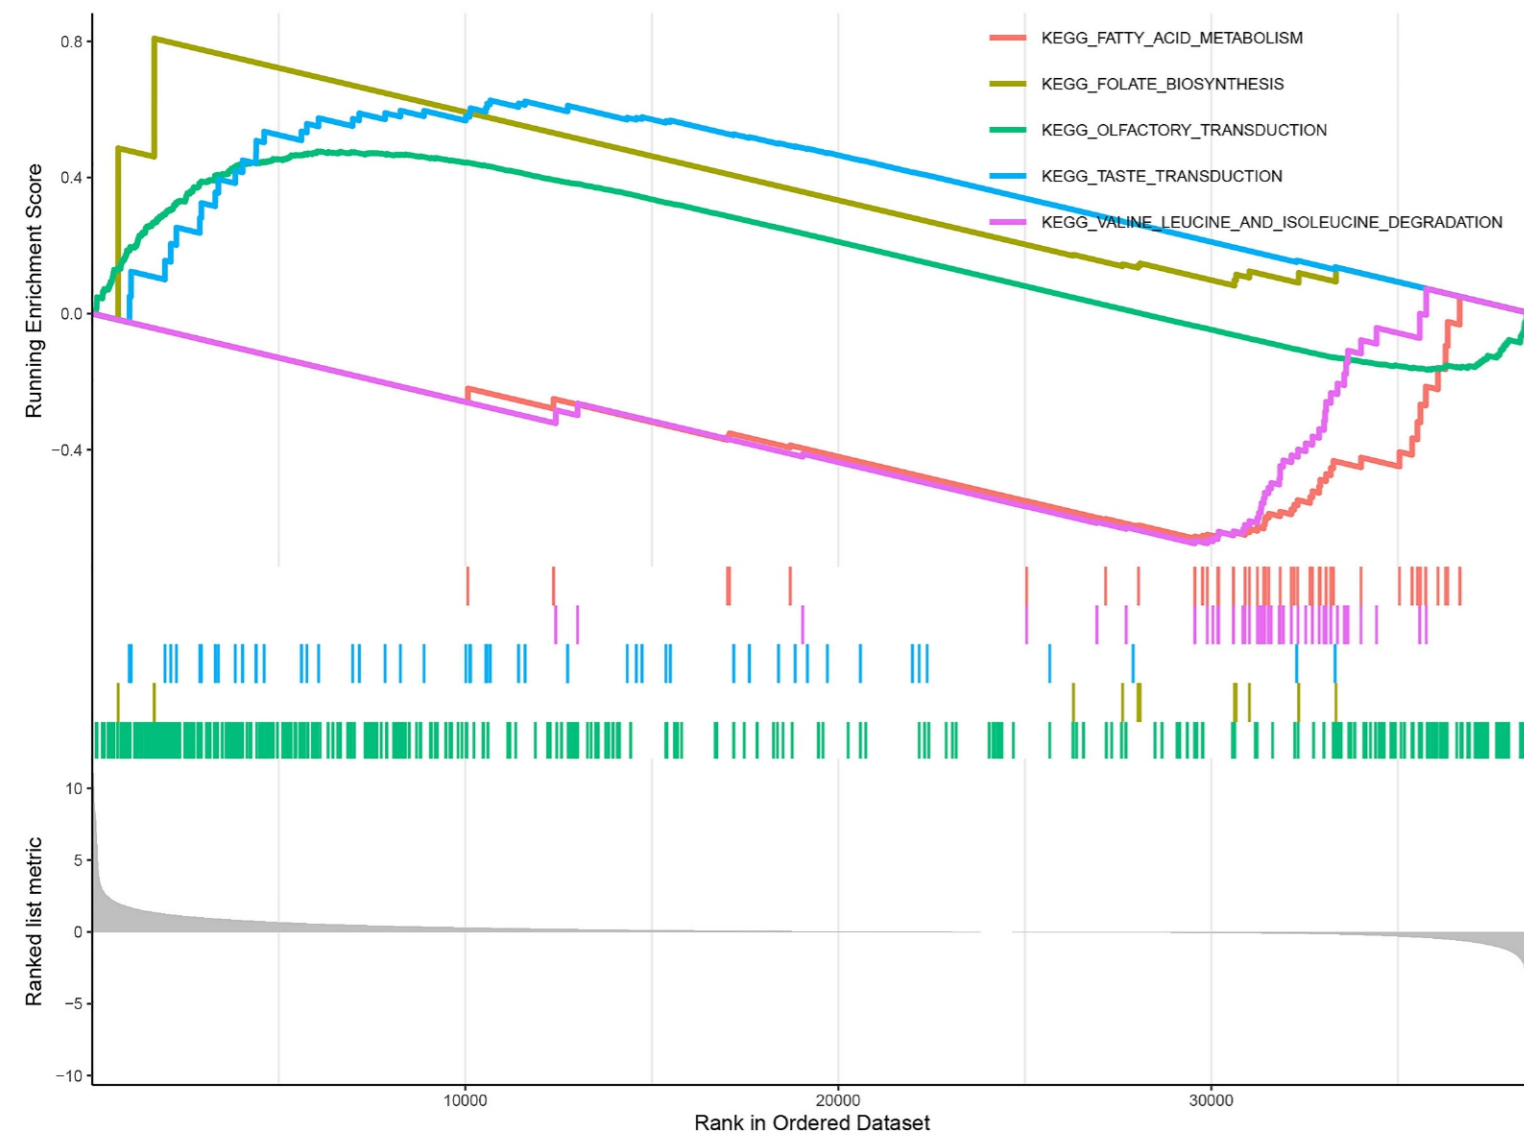

### LGG

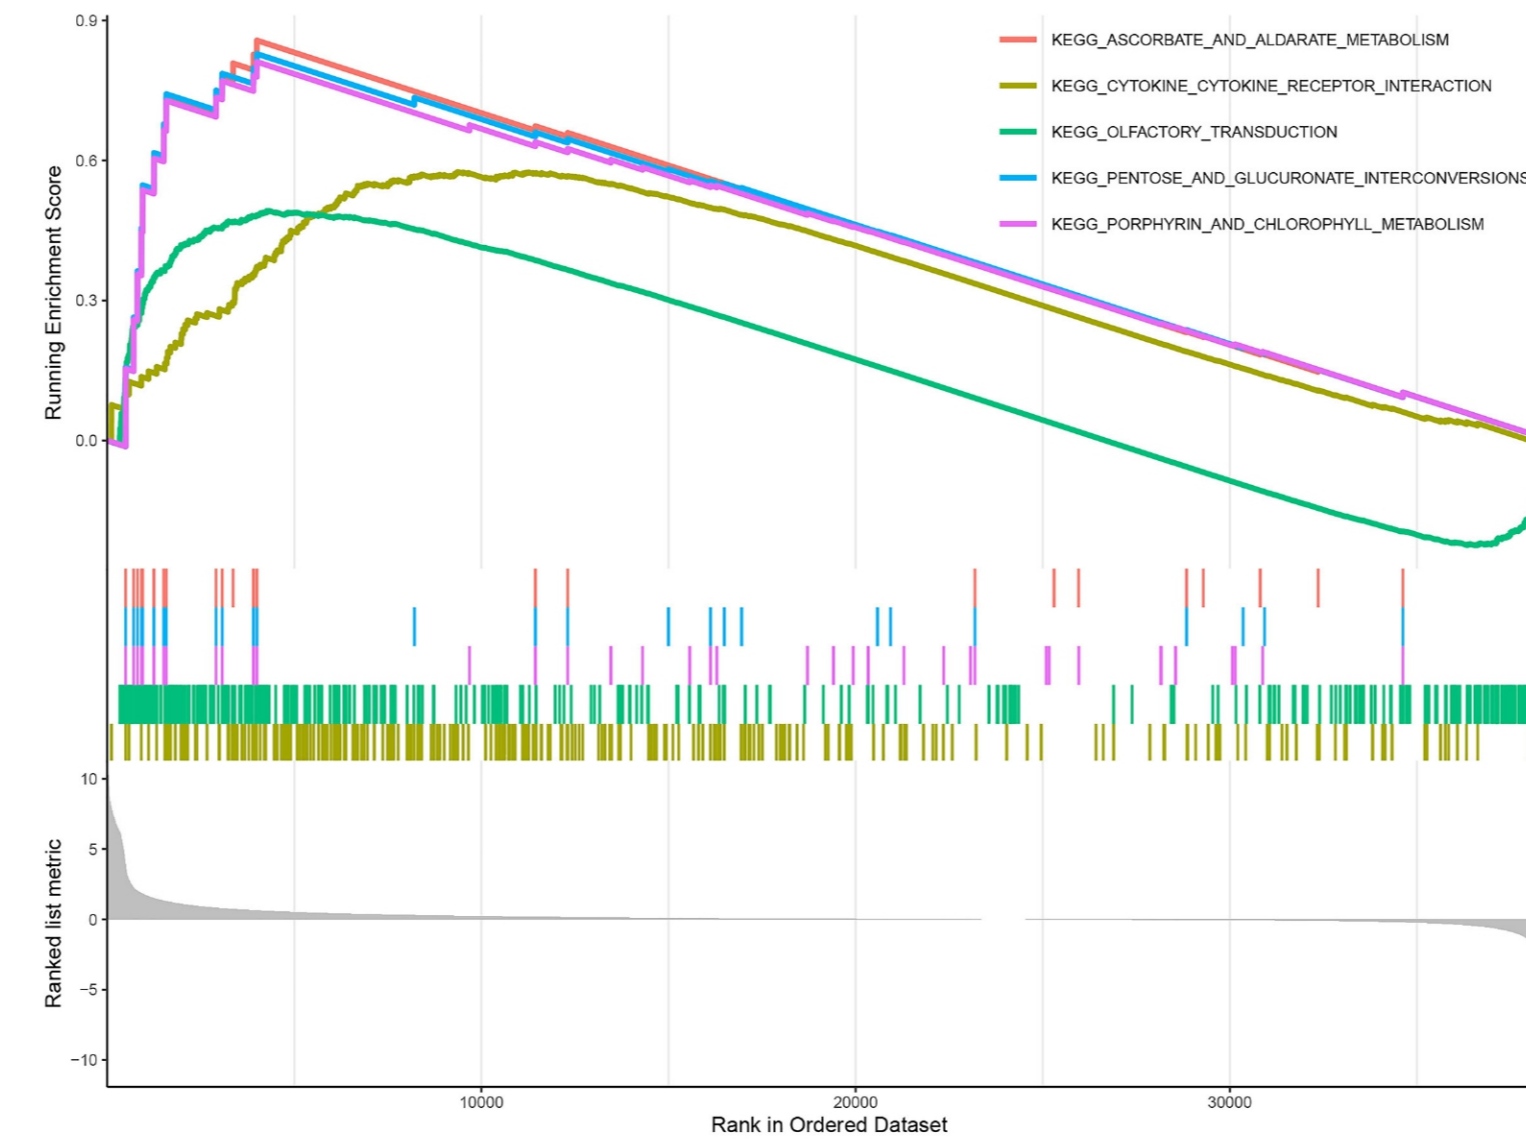

### PCPG

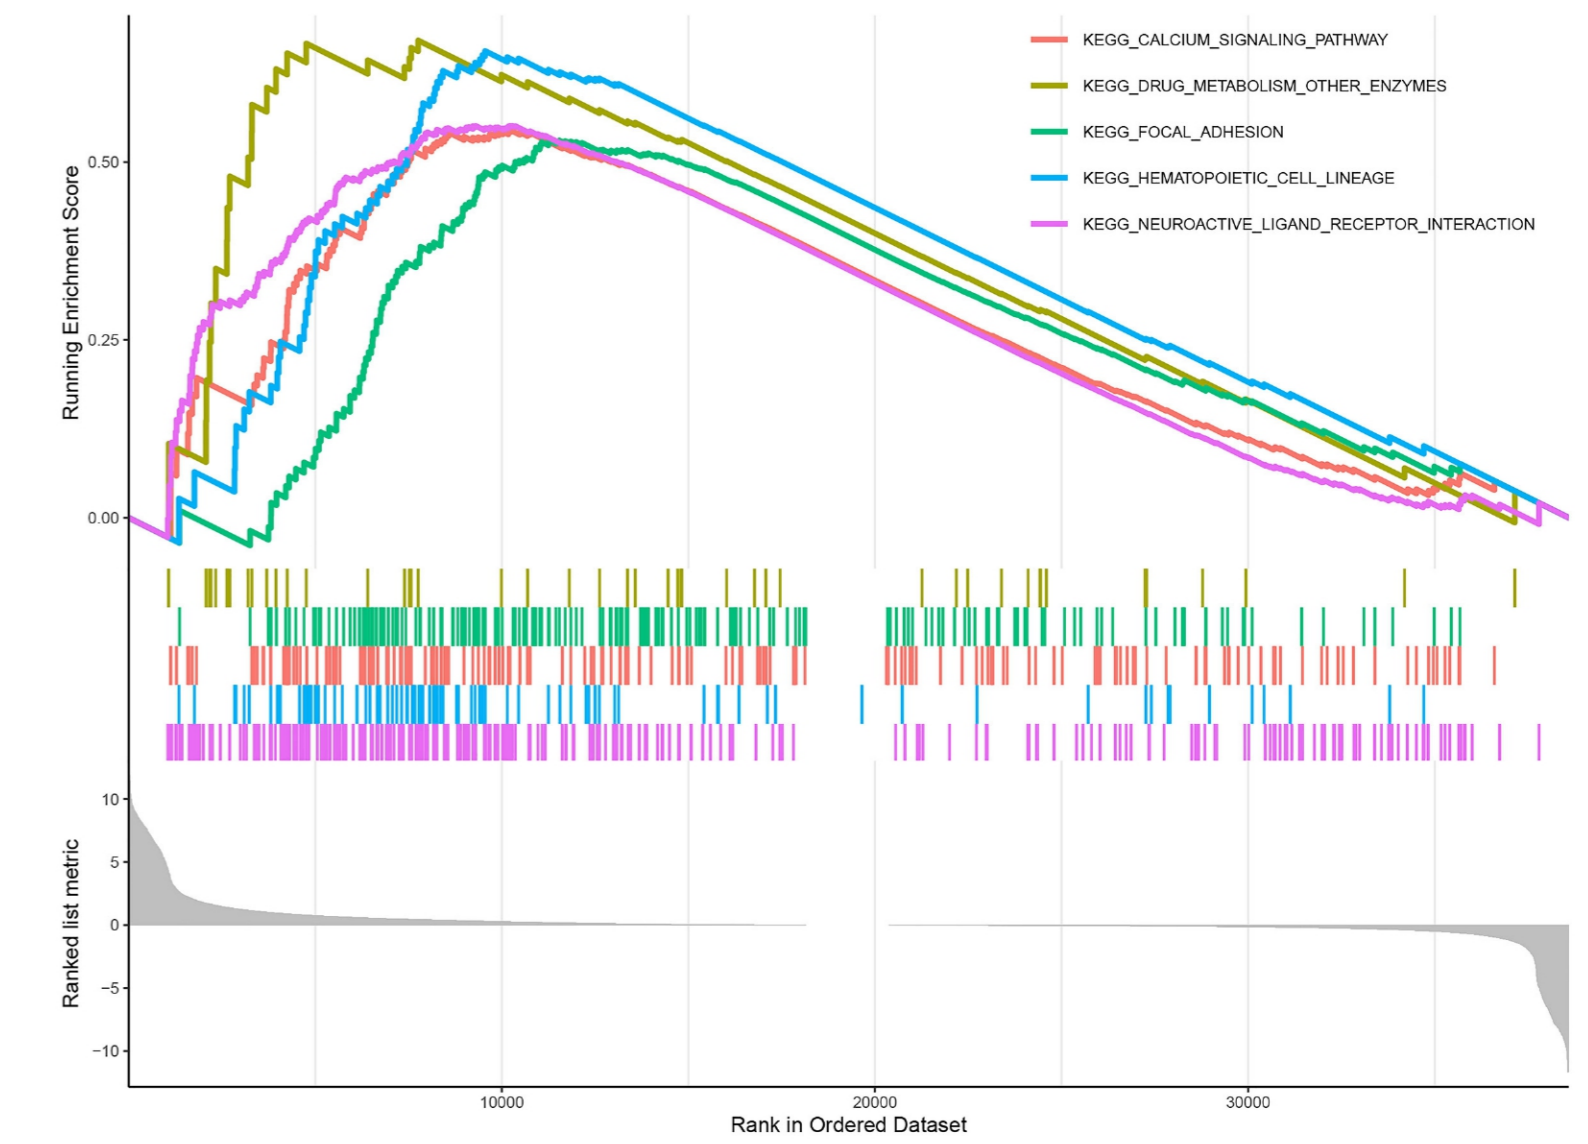

### SARC

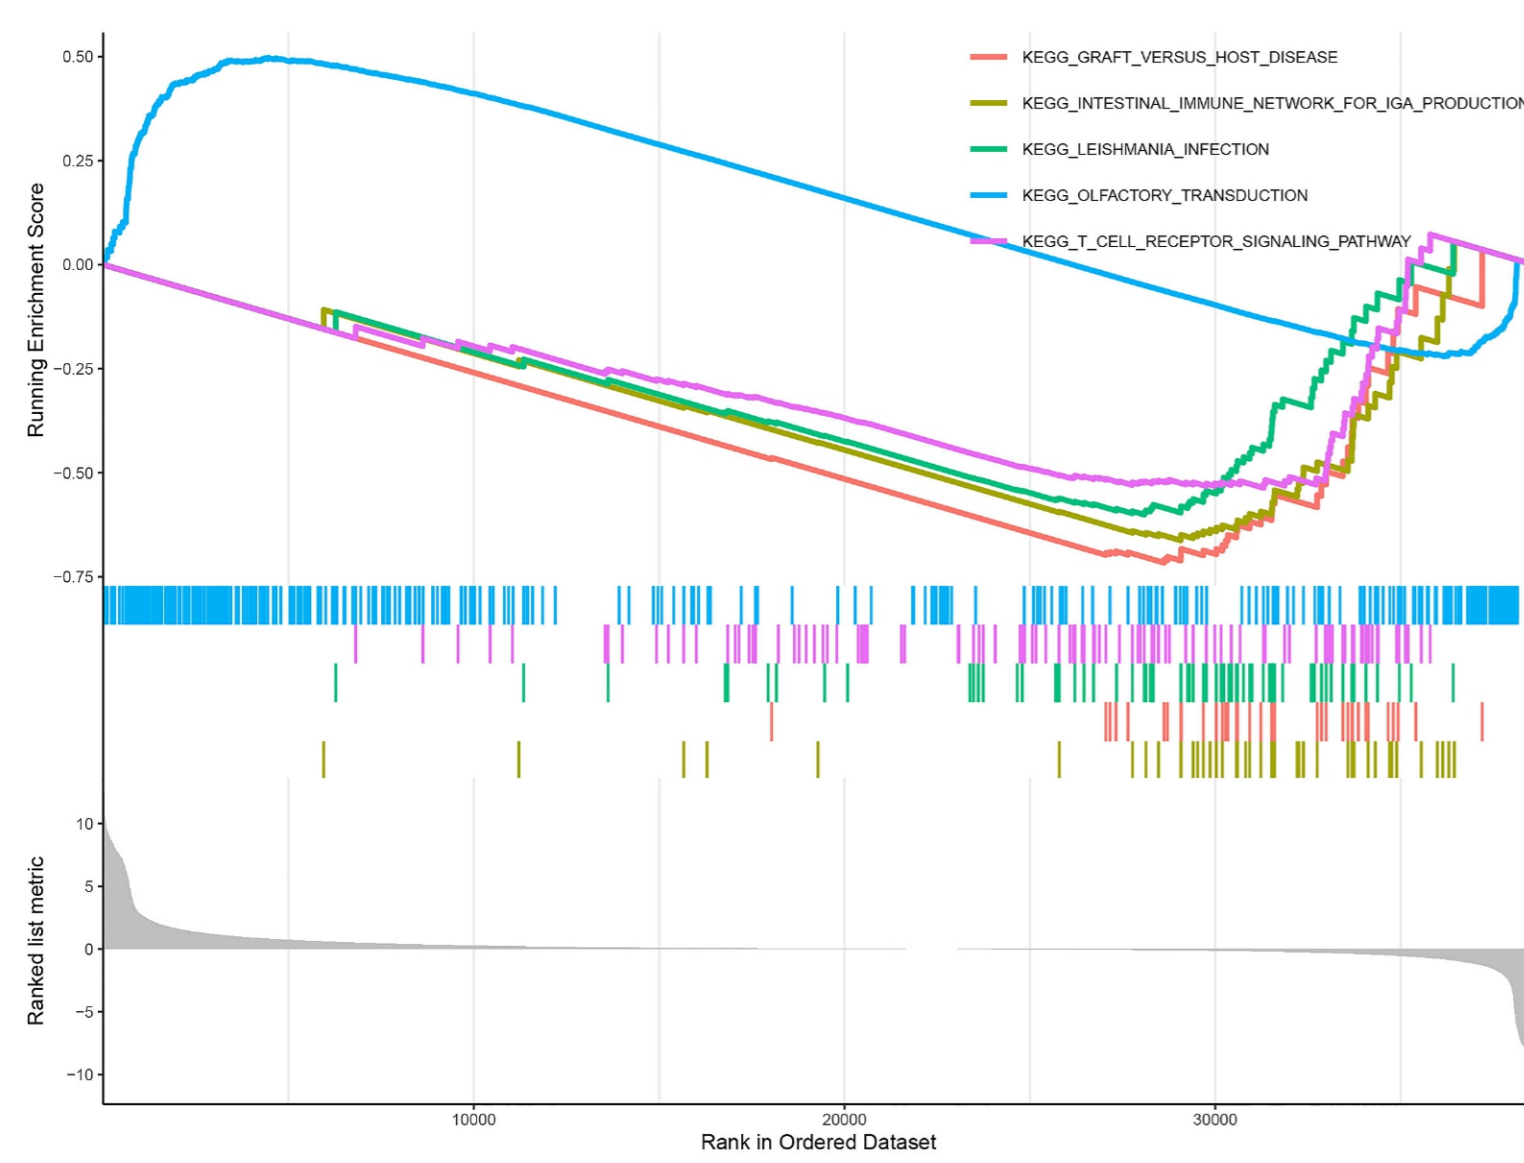

### SKCM

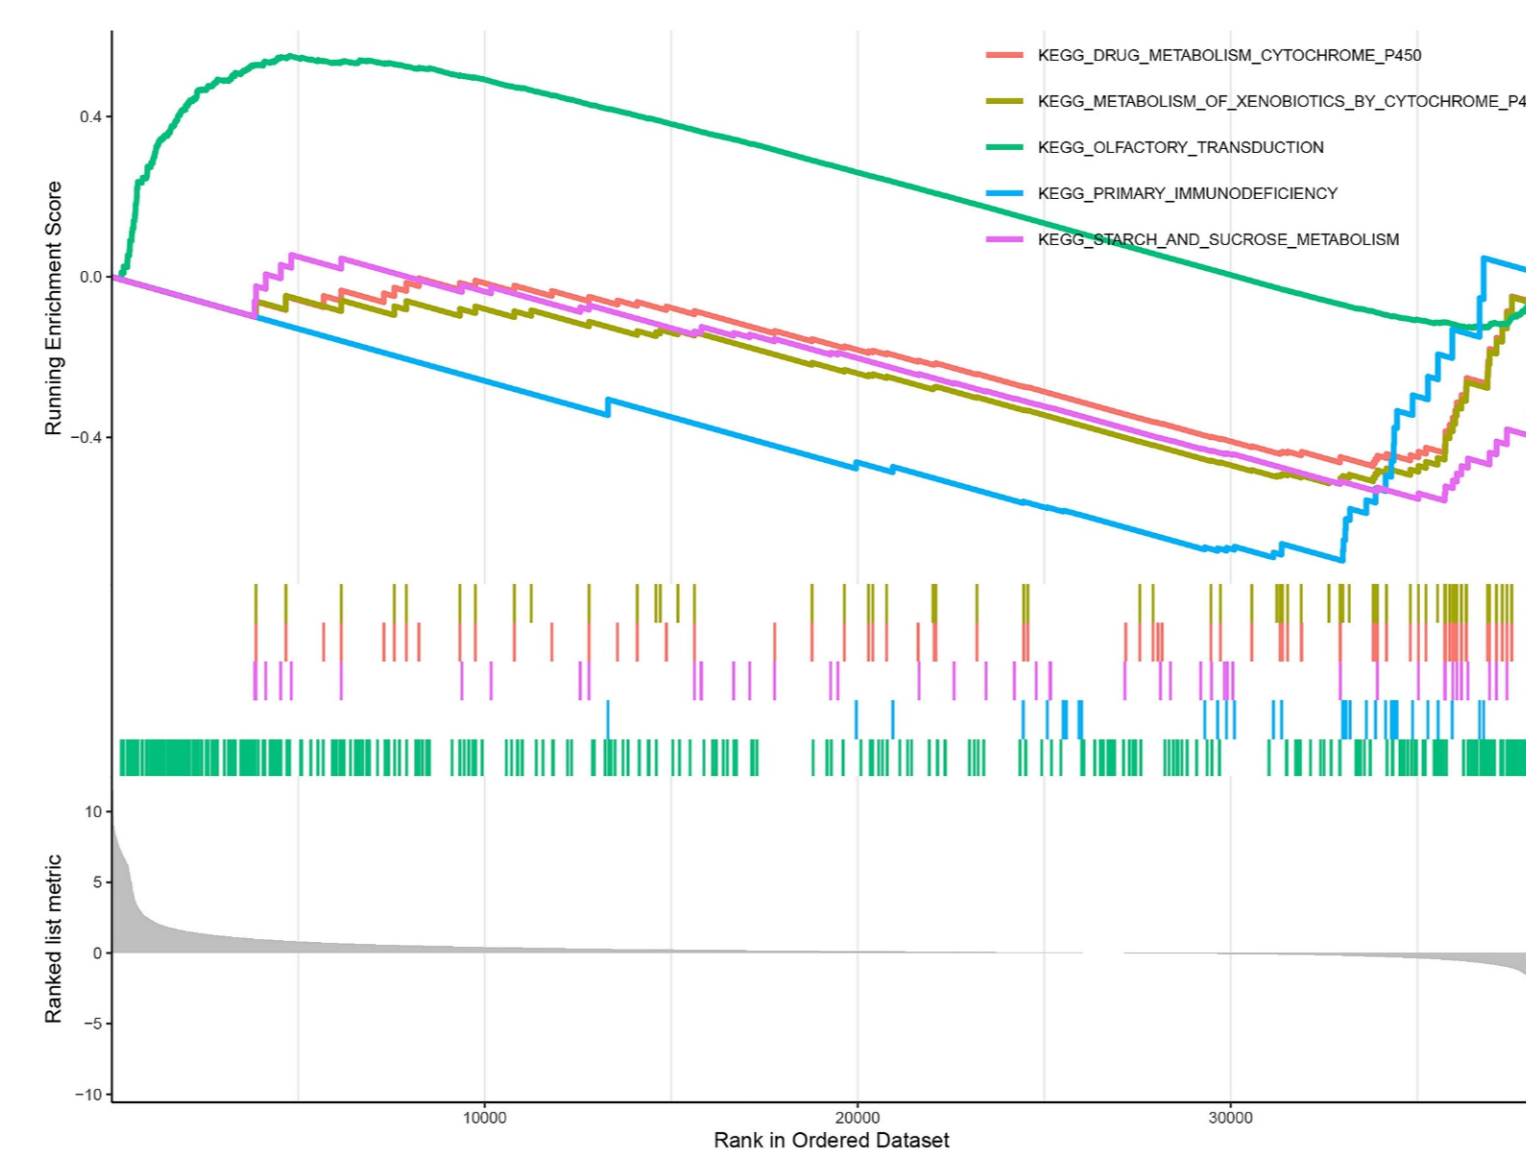

### STAD

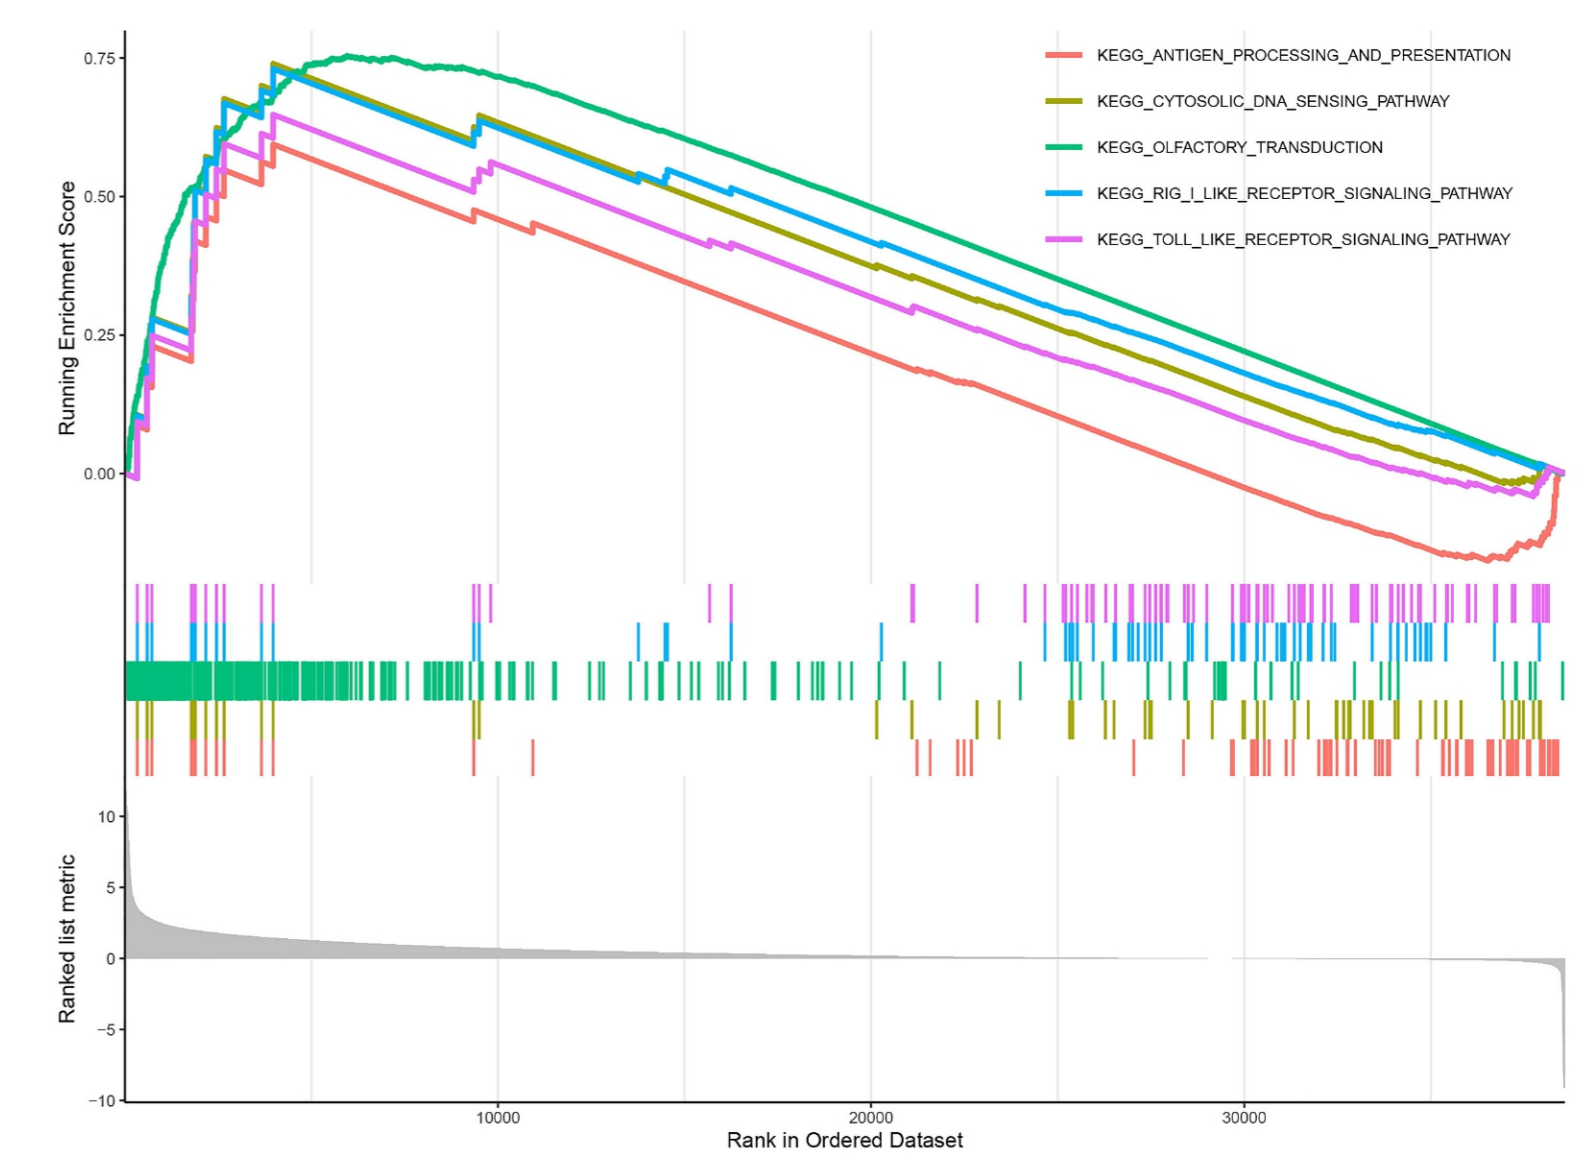

### TGCT

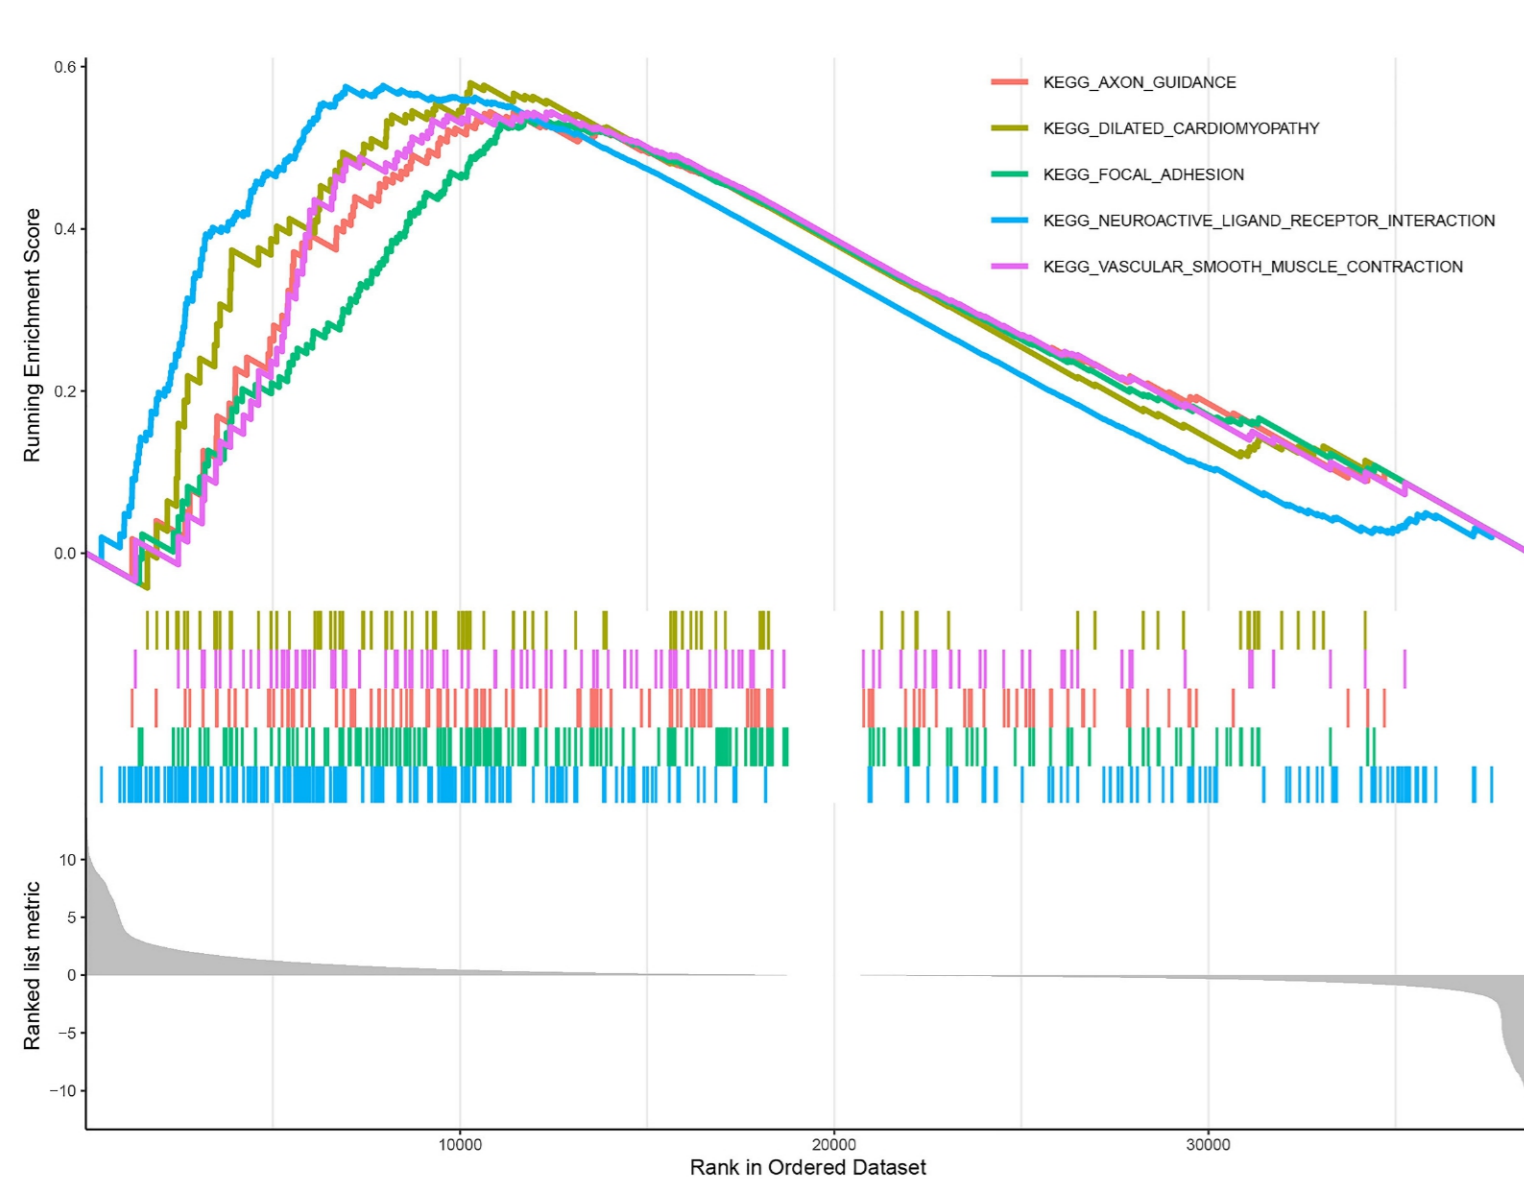

### UVM

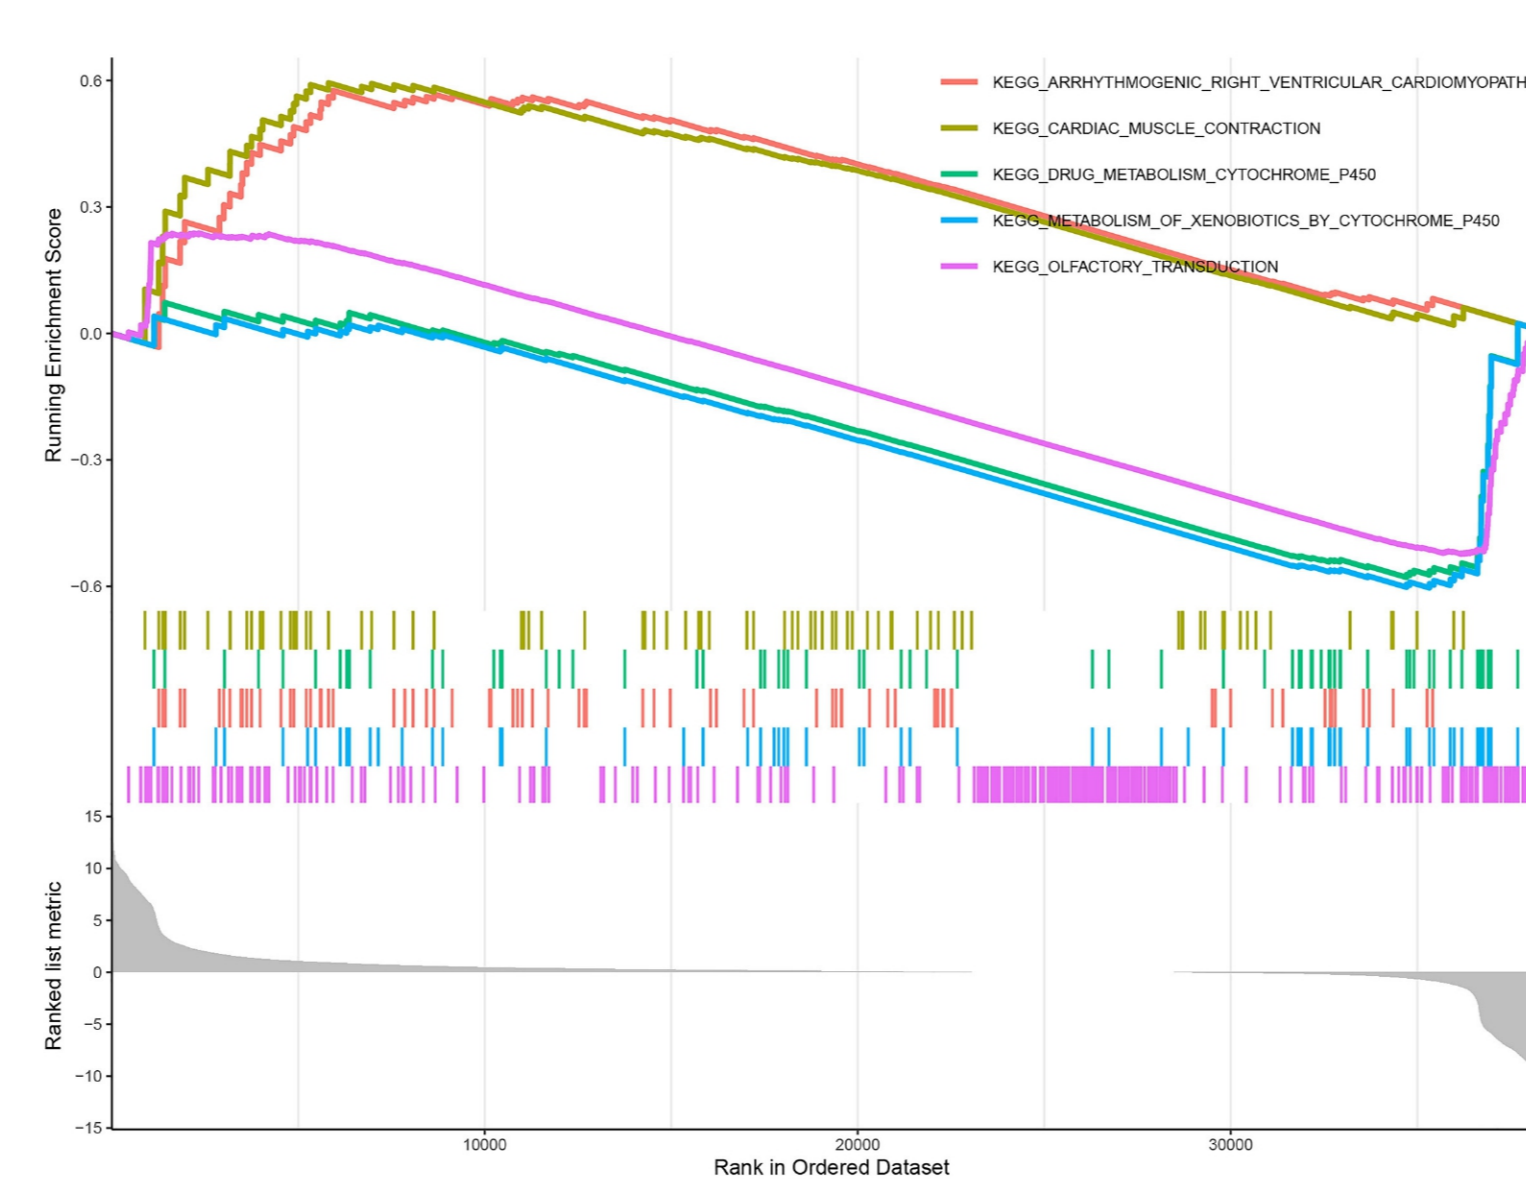

# Supplementary Figure 5

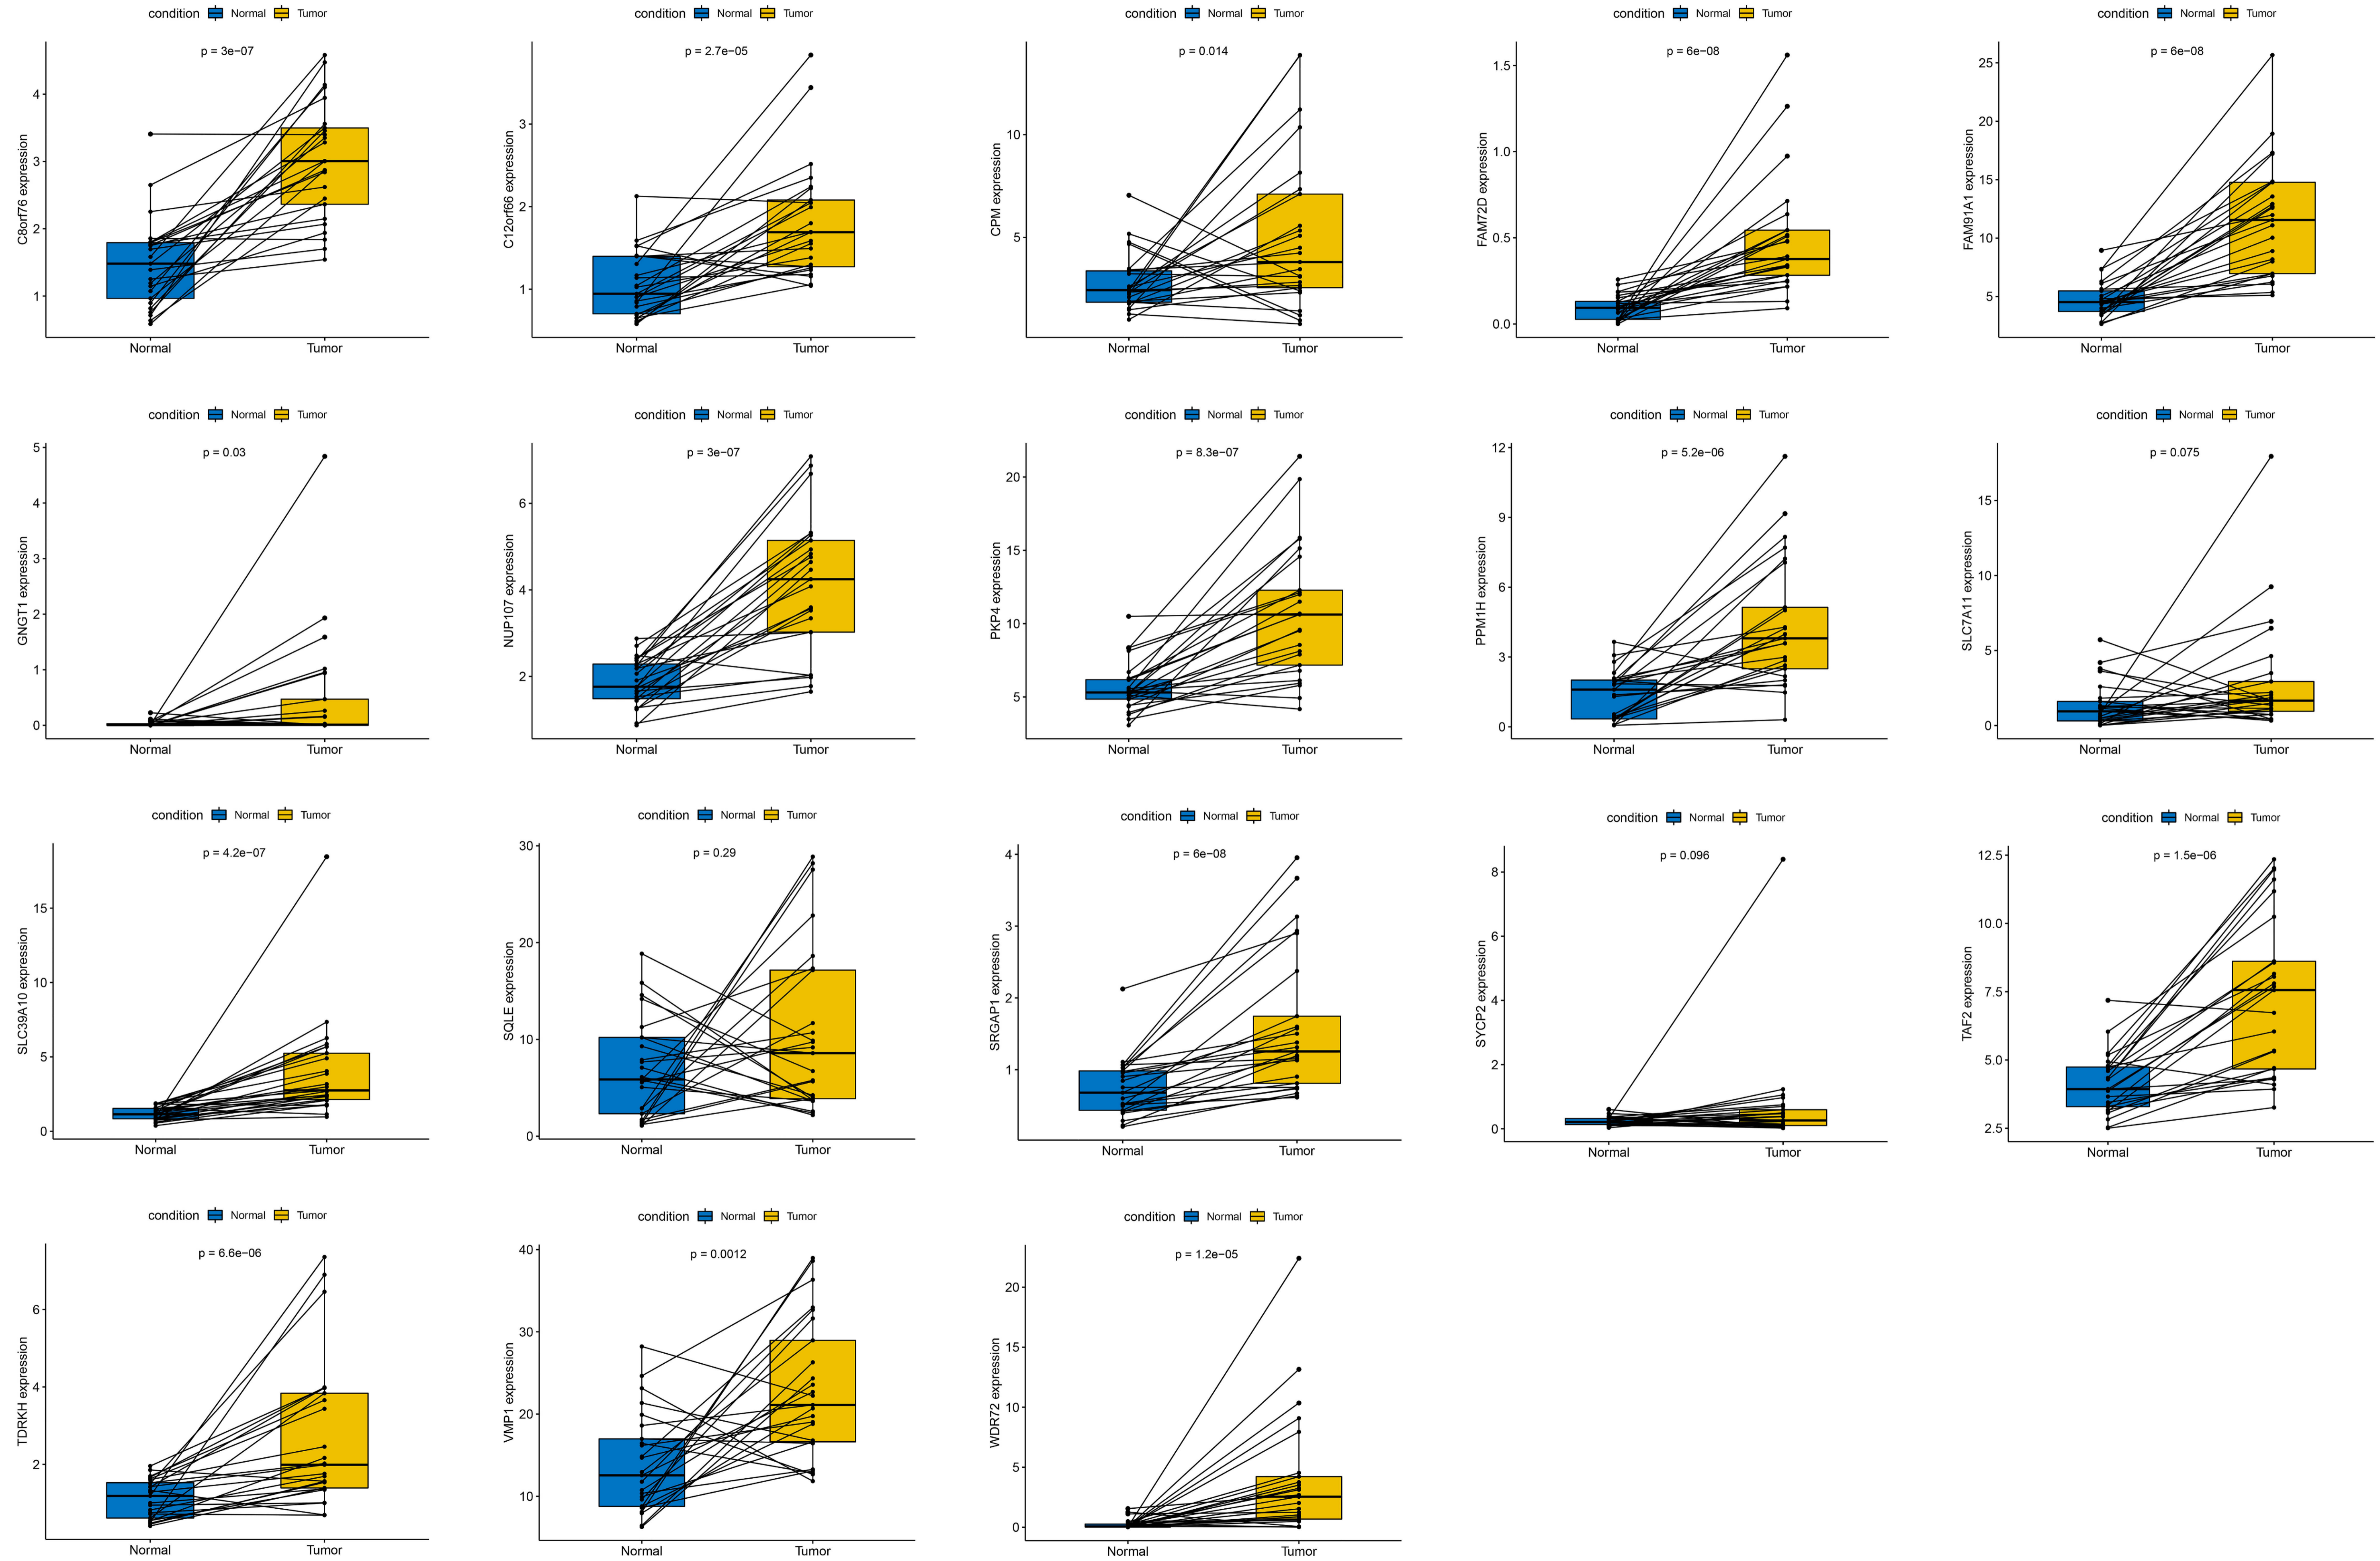

Supplementary Figure 6

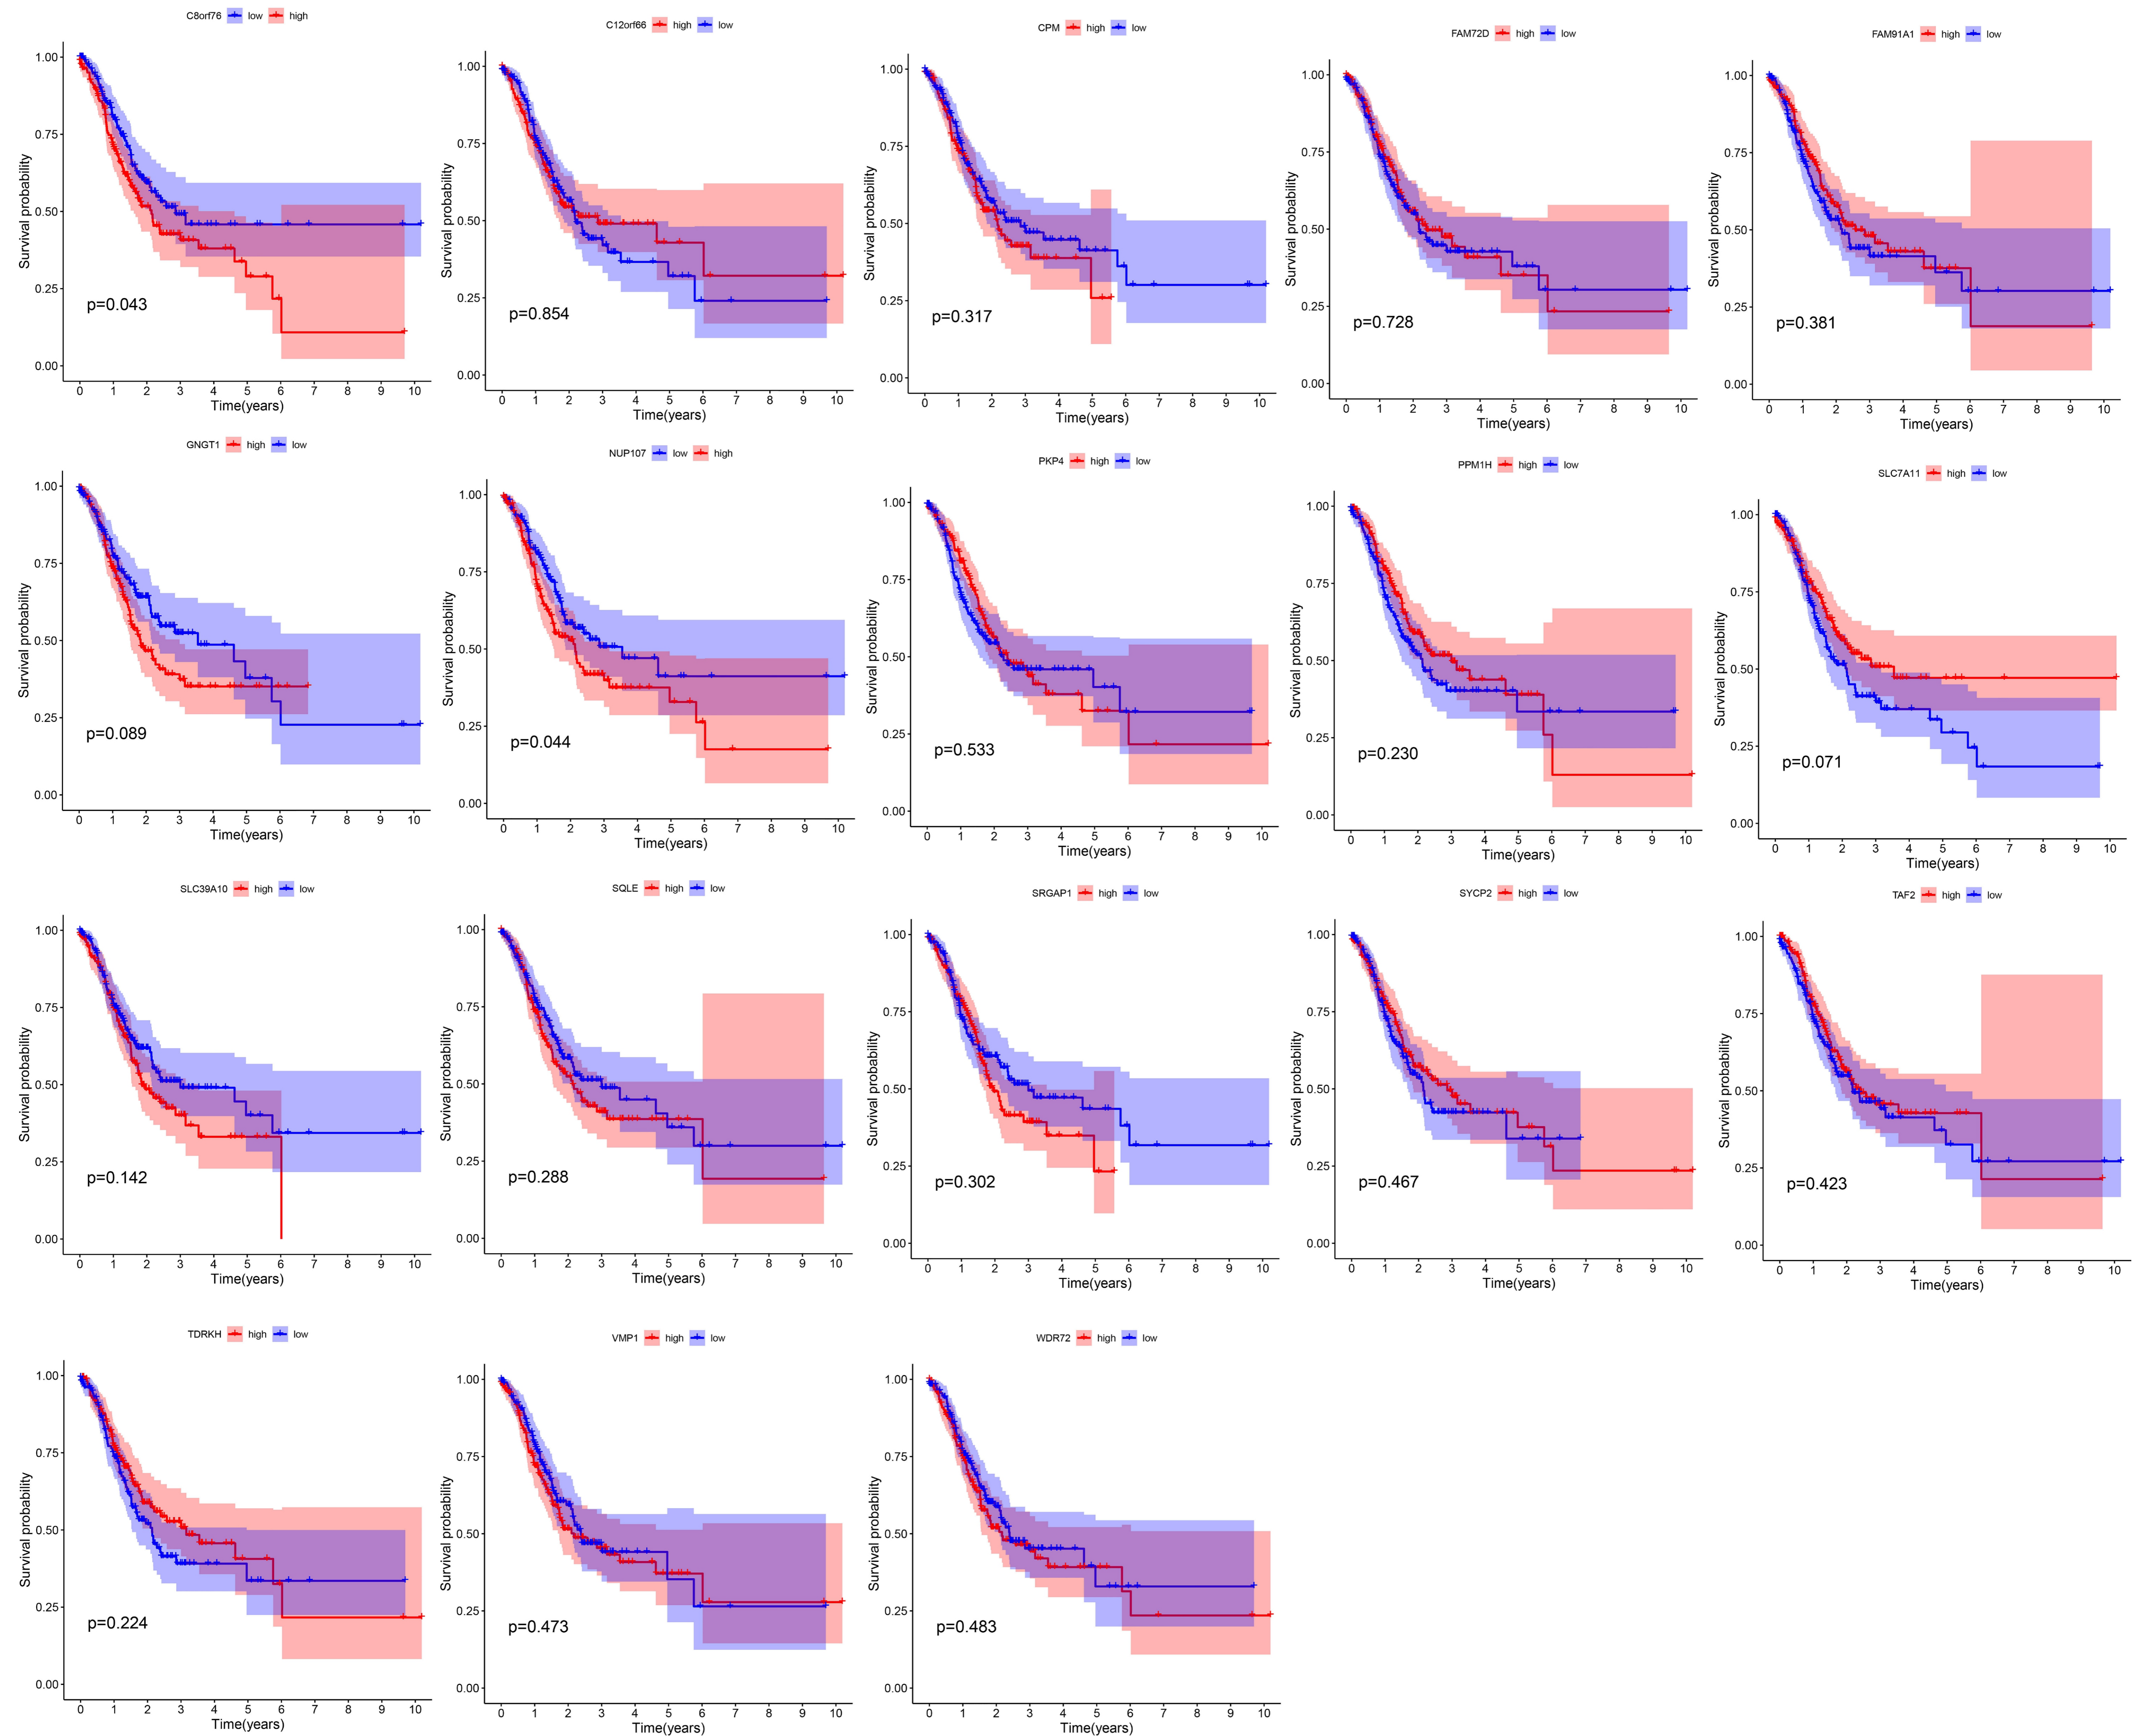

Supplement: MOESM1 [file 12672_2022_487_MOESM1_ESM.pdf]
